1 **TITLE**

2 Homogeneity of antibody-drug conjugates critically impacts the therapeutic efficacy in brain tumors

3

4 **AUTHORS**

5 Yasuaki Anami<sup>1</sup>, Yoshihiro Otani<sup>2</sup>, Wei Xiong<sup>1</sup>, Summer Y. Y. Ha<sup>1</sup>, Aiko Yamaguchi<sup>1</sup>, Ningyan Zhang<sup>1</sup>,  
6 Zhiqiang An<sup>1</sup>, Balveen Kaur<sup>2</sup>, Kyoji Tsuchikama\*<sup>1</sup>

7

8 <sup>1</sup>Texas Therapeutics Institute, The Brown Foundation Institute of Molecular Medicine, McGovern  
9 Medical School, The University of Texas Health Center at Houston, Houston, Texas 77054, USA.

10 <sup>2</sup>Department of Neurosurgery, McGovern Medical School, The University of Texas Health Science  
11 Center at Houston, Houston, Texas 77030, USA.

12 \*Correspondence: Kyoji Tsuchikama ([Kyoji.Tsuchikama@uth.tmc.edu](mailto:Kyoji.Tsuchikama@uth.tmc.edu))

## 13 **SUMMARY**

14 Glioblastoma multiforme (GBM) is characterized by aggressive growth and the poorest prognosis of  
15 all brain tumor types. Most therapies rarely provide clinically meaningful improvements in outcomes of  
16 patients with GBM. Antibody-drug conjugates (ADCs) are emerging chemotherapeutics with stunning  
17 success in cancer management. Although promising, clinical studies of three ADCs for treating GBM,  
18 including Depatux-M, have been discontinued because of safety concerns and limited therapeutic  
19 benefits. Here, we report that ADC homogeneity is a critical parameter to maximize the therapeutic  
20 potential in GBM therapy. We demonstrate that homogeneous conjugates generated using our linker  
21 show enhanced drug delivery to intracranial brain tumors. Notably, compared to heterogeneous ADCs,  
22 including a Depatux-M analog, our ADCs provide greatly improved antitumor effects and survival  
23 benefits in orthotopic brain tumor models, including a patient-derived xenograft model of GBM. Our  
24 findings warrant the future development of homogeneous ADCs as promising molecular entities toward  
25 cures for intractable brain tumors.

## 26 INTRODUCTION

27 Glioblastoma multiforme (GBM) is the most aggressive brain tumor characterized by infiltrative  
28 growth to normal tissues, high proliferation rate, abundant angiogenesis, and intratumor and inter-  
29 patient heterogeneity (Inda et al., 2014; Parker et al., 2015; Shergalis et al., 2018). GBM has poorer  
30 survival rates than all other brain tumors (median survival time: 15-16 months) (Chinot et al., 2014;  
31 Stupp et al., 2005, 2009) due to quick relapse after standard therapy, namely surgical removal in  
32 combination with radiation therapy, chemotherapy using temozolomide, and/or tumor-treating fields.  
33 Deep infiltration of GBM into normal brain tissues makes complete surgical resection of tumor lesions a  
34 challenging task. While surgery is a proven option for primary GBM, its clinical benefit for patients with  
35 relapsed GBM remains unvalidated (Weller et al., 2014). To improve patients' survival and quality of  
36 life, effective systemic therapies that can complement other treatment options are urgently needed.

37

38 Antibody-drug conjugates (ADCs) are an emerging class of chemotherapeutic agents consisting of  
39 tumor-targeting monoclonal antibodies (mAbs) with highly cytotoxic payloads attached through  
40 chemical linkers. ADCs can exert a durable and tumor-specific therapeutic effect by ensuring the  
41 delivery of conjugated cytotoxic payloads to antigen-positive tumor cells. Eleven ADCs have been  
42 approved by the U.S. Food and Drug Administration (FDA) (Dhillon, 2018; Drago et al., 2021; Mullard,  
43 2021), and more than 100 ADCs are currently in clinical trials (Chau et al., 2019). Despite the success  
44 in the management of other cancers, ADCs have not yet shown remarkable treatment outcomes in  
45 patients with GBM. Three ADCs have advanced to clinical trials for GBM therapy: depatuxizumab  
46 mafodotin (Depatux-M or ABT-414) (Phillips et al., 2016), ABBV-221 (Phillips et al., 2018), and AMG-  
47 595 (Hamblett et al., 2015). These ADCs target EGFR and its active mutant EGFR variant III  
48 (EGFRvIII), which are signature receptors expressed in a subset of GBM tumors (Brennan et al., 2013).  
49 Unfortunately, clinical trials of the three ADCs have been terminated or discontinued (Newman, 2019;  
50 Rosenthal et al., 2019; Van Den Bent et al., 2020). No survival benefit was confirmed in a Phase 3 trial  
51 evaluating Depatux-M in patients with newly diagnosed GBM (Van Den Bent et al., 2020). In a

52 preclinical study, ABBV-221 demonstrated greater treatment efficacy than could be achieved with  
53 Depatux-M; however, a Phase 1 study has raised safety concerns (Newman, 2019). The development  
54 of AMG-595 was discontinued upon completion of a Phase 1 study due to limited efficacy. Unlike other  
55 solid tumors, efficient mAb delivery to the brain is particularly challenging because of the blood–brain  
56 barrier (BBB), a tightly constituted endothelial cell border restricting the influx of large molecules from  
57 the vasculature to the brain parenchyma (Abbott et al., 2010; Banks, 2016). Therefore, to establish  
58 ADC-based GBM therapy as a practical clinical option, identifying and optimizing molecular parameters  
59 that negatively influence BBB permeability, therapeutic efficacy, and safety profiles are critically  
60 important.

61

62 Herein, we report that ADC homogeneity plays a critical role in payload delivery to intracranial brain  
63 tumors. We demonstrate that homogeneous ADCs elicit improved antitumor activity in intracranial brain  
64 tumor-bearing mouse models compared with heterogeneous variants prepared by stochastic cysteine–  
65 maleimide or lysine–amide coupling. We also show using mouse models how homogeneous  
66 conjugation at an optimal drug-to-antibody ratio (DAR) improves efficiency in payload delivery to  
67 intracranial GBM tumors, leading to dramatically extended survival. This finding suggests that ensuring  
68 ADC homogeneity is a crucial step to achieving clinically meaningful treatment outcomes in brain  
69 tumors, including GBM.

70

## 71 **RESULTS**

### 72 **Construction of anti-EGFR ADCs with varied homogeneity**

73 We have previously established click chemistry-empowered branched linkers for installing two  
74 identical or different payloads onto a single antibody in a site-specific and quantitative manner (Anami  
75 and Tsuchikama, 2020; Anami et al., 2017; Yamazaki et al., 2021). We have also developed the  
76 glutamic acid–valine–citrulline (EVCit) cleavable linker enabling the intracellular release of payloads in  
77 a traceless fashion while minimizing premature linker degradation in human and mouse plasma (Anami



78 et al., 2018). Indeed, we have confirmed that the maximum tolerated dose of an EVCit-based dual-drug  
79 ADC containing monomethyl auristatin E (MMAE) and monomethyl auristatin F (MMAF) is higher than  
80 40 mg/kg in non-tumor bearing mice (Yamazaki et al., 2021). Using these technologies, we set out to  
81 construct a homogeneous ADC targeting both EGFR and EGFRvIII (**Figure 1A**). We used cetuximab  
82 with N88A and N297A double mutations for ADC construction. Cetuximab, a human–murine chimeric  
83 mAb targeting the extracellular domain III of EGFR and EGFRvIII, has been approved for the treatment  
84 of colorectal cancer and head and neck cancer (Eli Lilly, 2004). The N88A/N297A double mutations  
85 remove two *N*-glycans on the side chains of asparagine 88 within the Fab moiety and asparagine 297  
86 within the Fc moiety (Giddens et al., 2018). Thus, this modification allows the omission of the  
87 deglycosylation step required for following microbial transglutaminase (MTGase)-mediated linker  
88 conjugation. In addition, *N*-glycan removal abrogates immune responses derived from interactions with  
89 Fcγ receptors expressed in immune cells, which can minimize undesired systemic toxicity or  
90 inflammatory response (Herbst et al., 2020; White et al., 2020). Atezolizumab (TECENTRIQ<sup>®</sup>, anti-PD-  
91 L1 mAb) is a recent example with an N297A mutation approved by the FDA.

92  
93 We began the ADC construction by installing branched diazide linkers site-specifically onto  
94 glutamine 295 (Q295) within the parent N88A/N297A anti-EGFR mAb using MTGase (Anami and  
95 Tsuchikama, 2020) (**Figure 1A**). This enzymatic conjugation yielded a homogeneous mAb–branched  
96 linker conjugate in high yield. In parallel, we synthesized a payload module consisting of  
97 bicyclo[6.1.0]nonyne (BCN, as a reaction handle for following strain-promoted azide–alkyne click  
98 reaction), EVCit (as a cathepsin-responsive cleavable sequence), *p*-aminobenzyloxycarbonyl (PABC)  
99 spacer, and MMAF (BCN–EVCit–PABC–MMAF, see Supplementary Information for synthesis details).  
100 Finally, the click reaction between the azide groups on the branched linkers and BCN–EVCit–PABC–  
101 MMAF quantitatively afforded anti-EGFR ADC **1** with a DAR of 4. We confirmed the homogeneity of  
102 ADC **1** by reverse-phase HPLC and electrospray ionization mass spectrometry (ESI-MS) analysis  
103 (**Figure S1A**). Using the same parent anti-EGFR mAb, we also prepared two heterogeneous variants

104 that resemble the structure of Depatux-M (Cys conjugate **2**) (Phillips et al., 2016) or the conjugation  
 105 modality of AMG-595 (Lys conjugate **3**) (Hamblett et al., 2015). For the preparation of Cys conjugate **2**,  
 106 non-cleavable maleimidocaproyl MMAF (MC-MMAF) was installed by partial disulfide bond reduction  
 107 and following cysteine–maleimide alkylation. We confirmed by hydrophobic interaction chromatography  
 108 (HIC) analysis that Cys conjugate **2** consisted of DAR-0, 2, 4, 6, and 8 species (average DAR: 3.8,  
 109 **Figure 1B**). To prepare Lys conjugate **3**, we synthesized and used non-cleavable MMAF–N-  
 110 hydroxysuccinimide (NHS) ester for lysine coupling-based conjugation (See Supplementary Information  
 111 for synthesis details). ESI-MS analysis revealed that this heterogeneous conjugate consisted of multiple  
 112 products with DARs ranging from 0 to 8 (average DAR: 3.9, **Figure 1C**).

113

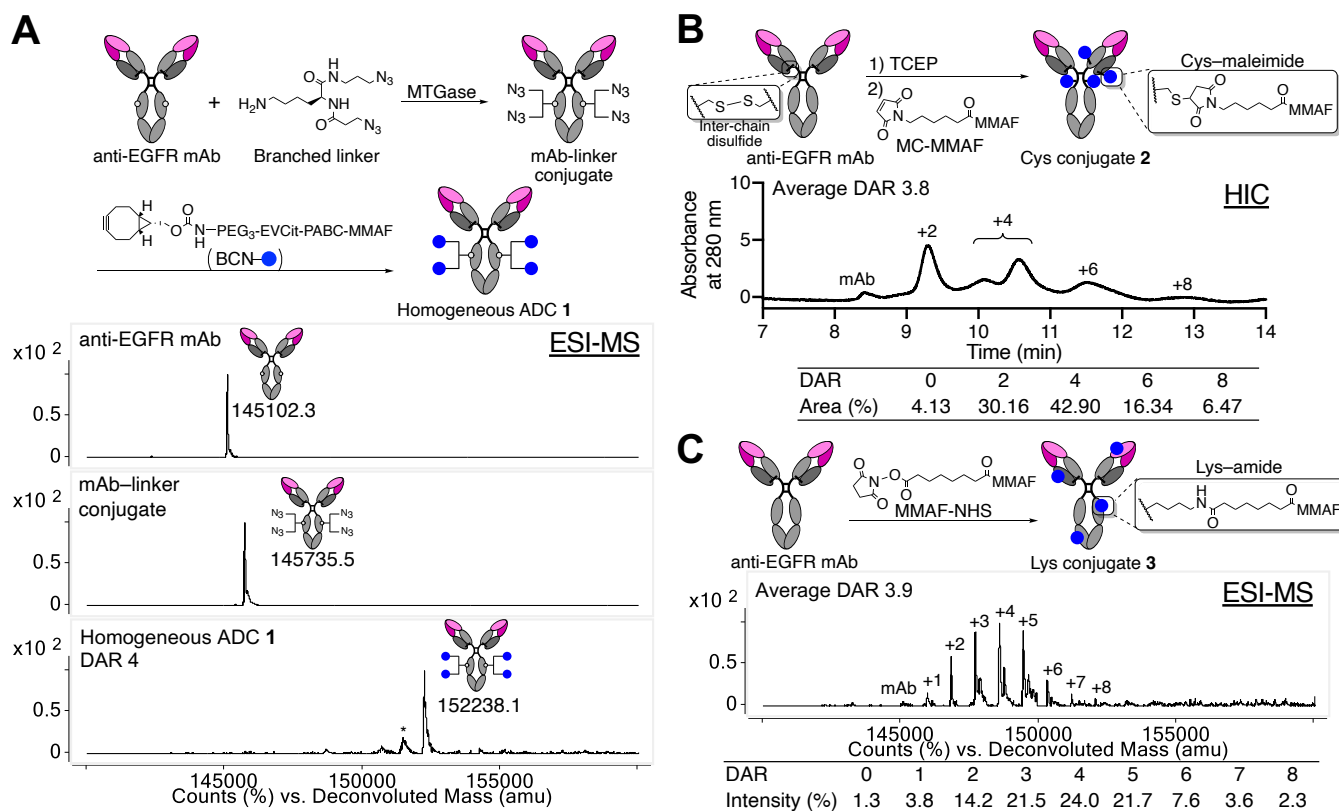

114

115 **Figure 1.** Construction and characterization of anti-EGFR ADCs. **A** Preparation and ESI-MS analysis of  
 116 homogeneous ADC **1**. Top panel: N88A/N297A anti-EGFR mAb (cetuximab mutant). Middle panel:  
 117 mAb–linker conjugate. Bottom panel: homogeneous ADC **1** with a DAR of 4. Asterisk (\*) indicates a  
 118 fragment ion detected in ESI-MS analysis. **B** Preparation and HIC analysis of Cys conjugate **2** under

119 physiological conditions (phosphate buffer, pH 7.4). The average DAR was determined to be 3.8 based  
120 on UV peak area of each DAR species. **C** Preparation and ESI-MS analysis of Lys conjugate **3**. The  
121 average DAR was determined to be 3.9 based on the ion intensity of each DAR species. BCN,  
122 bicyclo[6.1.0]nonyne; DAR, drug-to-antibody ratio; ESI-MS, electrospray ionization mass spectrometry;  
123 MC, maleimidecaproyl; MMAF, monomethyl auristatin F; MTGase, microbial transglutaminase; HIC,  
124 hydrophobicity interaction chromatography; NHS, *N*-hydroxysuccinimide; PABC, *p*-  
125 aminobenzyloxycarbonyl; PEG, polyethylene glycol; TCEP, tris(2-carboxyethyl)phosphine.

126

### 127 **Cysteine–maleimide conjugation does not impair EGFR-specific potency *in vitro* but reduces** 128 **long-term stability**

129 Size-exclusion chromatography (SEC) analysis revealed that all ADCs generated predominantly  
130 existed in the monomer form (**Figure S1B**). These ADCs were also tested for long-term stability under  
131 physiological conditions by being incubated at 37 °C in PBS (pH 7.4) for 28 days. We observed no  
132 significant degradation or aggregation for homogeneous ADC **1** and Lys conjugate **3** (**Figure S2**). In  
133 contrast, Cys conjugate **2** showed two new peaks after the peak corresponding to its monomeric form,  
134 indicating that fragmentation or partial dissociation of the heavy and light chains occurred. These  
135 results suggest that both MTGase-mediated homogeneous conjugation and lysine coupling offer higher  
136 thermal stability compared to the one achieved by cysteine–maleimide conjugation.

137

138 Next, we assessed antigen-specific binding of the ADCs by cell-based ELISA (**Figure 2A** and Table  
139 **S1**). All ADCs showed binding affinities for EGFRvIII-positive U87ΔEGFR-luc cells ( $K_D$ : 0.044–0.047  
140 nM) comparable to that of the unmodified N88A/N297A cetuximab ( $K_D$ : 0.039 nM). In addition, none of  
141 the ADCs bound to EGFR-negative HEK293 cells. These results demonstrate that the ADCs retained  
142 their binding affinity and specificity regardless of conjugation methods. We also tested these conjugates  
143 for cell killing potency in U87ΔEGFR-luc, Gli36δEGFR (EGFRvIII-positive), and HEK293 cells (EGFR-  
144 negative control) (**Figure 2B** and **Table S2**). All DAR 4 ADCs showed comparable potency in the  
145 EGFRvIII-positive GBM cells ( $EC_{50}$  values: 0.072–0.140 nM in U87ΔEGFR-luc and 0.035–0.048 nM in  
146 Gli36δEGFR cells), but not in HEK293 cells. This result is in line with previous reports demonstrating

147 that MMAF ADCs can exert pM-level cell killing potency with or without a cleavable linker (Deonarain et  
148 al., 2014; Doronina et al., 2006).

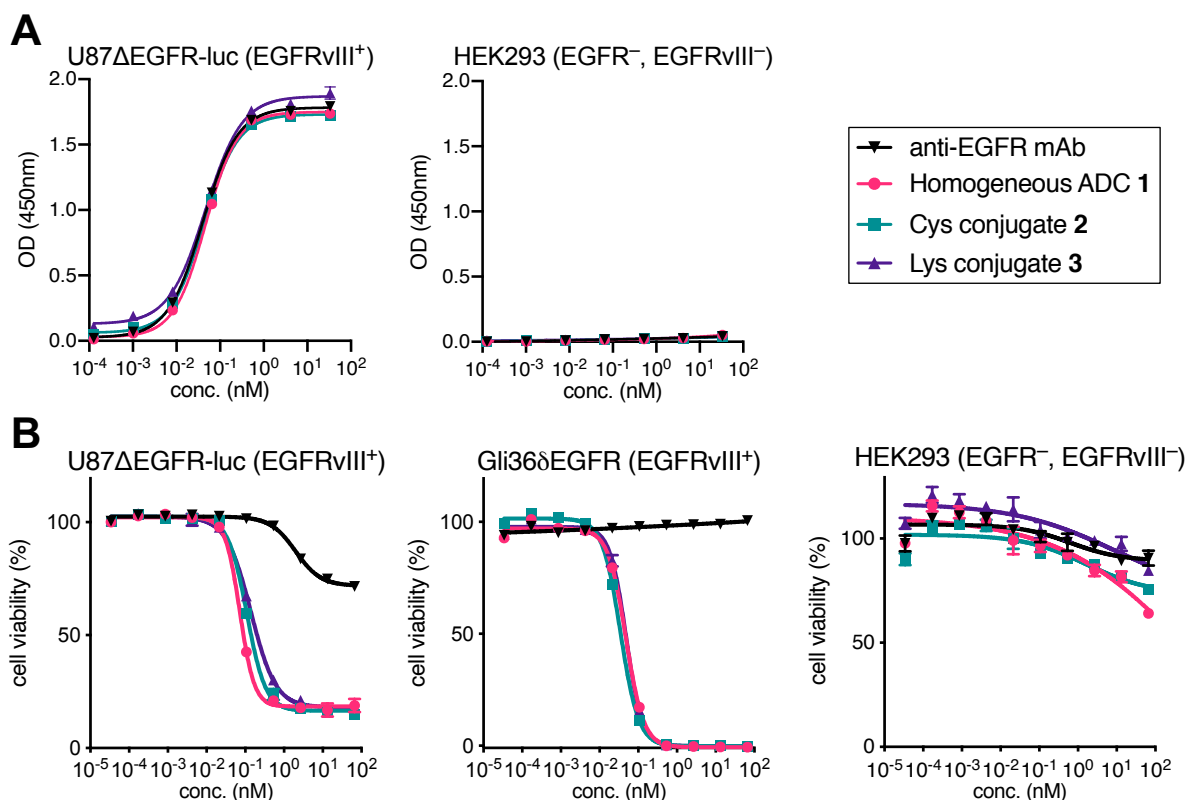

149

150 **Figure 2.** Evaluation of antigen-specific binding and *in vitro* cytotoxicity. **A** Cell-based ELISA in  
151 U87ΔEGFR-luc (EGFRvIII<sup>+</sup>) and HEK293 (wtEGFR<sup>-</sup>, EGFRvIII<sup>-</sup>) cells. **B** Cell killing potency in  
152 U87ΔEGFR-luc, Gli36δEGFR (EGFRvIII<sup>+</sup>), and HEK293. We tested the parent anti-EGFR mAb (black  
153 inversed triangle), homogeneous ADC 1 (magenta circle), Cys conjugate 2 (green square), and Lys  
154 conjugate 3 (purple triangle). Concentrations are based on the antibody dose without normalizing to  
155 each DAR. All assays were performed in triplicate. Data are presented as mean values ± SEM.

156

157 **The homogeneous anti-EGFR ADC exerts significantly improved therapeutic efficacy in**  
158 **orthotopic mouse models of GBM**

159 To evaluate the *in vivo* anti-tumor activity of the three anti-EGFR ADCs, we first performed a  
160 treatment study using a cell line-derived xenograft model of human GBM. To gain clinically translatable  
161 insights into the influence of conjugation modality on drug delivery to brain tumors, intracranially  
162 implanted models were used instead of subcutaneous models. NODscid gamma (NSG) mice were

163 orthotopically implanted with U87 $\Delta$ EGFR-luc cells and injected intravenously with a single dose of each  
164 ADC (homogeneous ADC **1**, Cys conjugate **2**, or Lys conjugate **3**) at 3 mg/kg 5 days post-implantation  
165 (**Figure 3A**). Tumor growth and body weight were monitored periodically (**Figure S3**). No acute toxicity  
166 associated with ADC administration was observed in either group over the course of the study (**Figure**  
167 **S3A**). The short survival time observed for the untreated group (median survival: 14 days, **Figure 3B**)  
168 demonstrates the extremely aggressive growth of this GBM model. Homogeneous ADC **1** exerted  
169 remarkable antitumor activity with statistically significant survival benefits; the median survival rate  
170 increased from 14 days in the untreated group to 43 days in the treated cohort (207% extension,  $P =$   
171 0.0032). In addition, two out of six mice survived at the end of the study (Day 60) with no detectable  
172 bioluminescence signal from implanted tumors (**Figure S3B**), indicating that these two mice achieved  
173 complete remission. In contrast, the heterogeneous conjugates exhibited limited therapeutic effects with  
174 marginally increased median survival times (22 days, Cys conjugate **2** and 23.5 days, Lys conjugate **3**),  
175 which were inferior to that provided by homogeneous ADC **1** ( $P = 0.0046$ ). Indeed, all mice in these two  
176 groups died or reached the pre-defined humane endpoint by the end of the study (**Figure 3B**). This  
177 result is in contrast to our observation that ADCs **1–3** showed comparable *in vitro* cell killing potency in  
178 U87 $\Delta$ EGFR-luc cells (**Figure 2B**).

179

180 To further validate the therapeutic potential of homogeneous ADC **1**, we sought to use a patient-  
181 derived xenograft (PDX) tumor model of GBM. PDX models maintain pathohistological and genetic  
182 properties of original tumors as well as therapeutic responses to anti-cancer treatments. As such, PDX  
183 models provide clinically relevant and translatable data (Hidalgo et al., 2014). To this end, we used  
184 GBM12, a PDX model of GBM overexpressing wild-type EGFR (Sarkaria et al., 2006). A study has  
185 shown that GBM12 tumors show heterogeneous BBB disruption, meaning that some GBM12 tumor  
186 cells are likely protected by an intact BBB (Parrish et al., 2015). Before initiating an *in vivo* assessment,  
187 homogeneous ADC **1** and heterogeneous Cys conjugate **2** were evaluated for cell killing potency in  
188 GBM12 cells. Both ADCs efficiently killed GBM12 cells with comparable EC<sub>50</sub> values (homogeneous

189 ADC **1**: 0.08 nM, Cys conjugate **2**: 0.11 nM, **Figure S4A**). Next, we investigated whether or not  
190 homogeneous conjugate **1** also showed a greater treatment effect in the orthotopic GBM12 mouse  
191 model than could be achieved by Cys conjugate **2**. NSG mice bearing intracranial GBM12 tumors were  
192 injected intravenously with a single dose of either conjugate (3 mg/kg) 8 days post-implantation (**Figure**  
193 **3C**). Tumor size was noninvasively measured by magnetic resonance imaging (MRI) on Day 18. No  
194 acute toxicity was observed in either group over the course of the study (**Figure S4B**). Homogeneous  
195 ADC **1** effectively suppressed tumor growth with a statistically significant survival benefit (median  
196 survival: 31 days, +55% relative to the vehicle group,  $P = 6.8 \times 10^{-8}$ ), whereas Cys conjugate **2** showed  
197 a marginal therapeutic effect (median survival: 23 days, +15% extension,  $P = 0.12$ , **Figure 3D**). MRI on  
198 Day 18 showed that the tumors treated with homogeneous ADC **1** (average size:  $14.71 \pm 7.90 \text{ mm}^3$ )  
199 were markedly smaller than the untreated ones (average size:  $203.46 \pm 23.81 \text{ mm}^3$ ,  $P < 0.0001$ ,  
200 **Figures 3E** and **3F**). Cys conjugate **2** also inhibited tumor growth (average size:  $88.63 \pm 13.71 \text{ mm}^3$ )  
201 but less effectively than homogeneous ADC **1** ( $P = 0.0279$ ). To investigate how each ADC influenced  
202 cell proliferation and apoptosis, we performed immunohistochemistry analysis of brain tissues  
203 harvested from each group at the terminal stage (vehicle: 20–26 days, ADC **1**: 30–35 days; Cys  
204 conjugate **2**: 24–31 days, **Figures S4C–F**). About 80% of cells were Ki67-positive in the vehicle-treated  
205 group, while about 70% of cells were Ki67-positive in both ADC-treated groups (**Figure 3G**). This result  
206 indicates that antiproliferative effects by both ADCs declined to similar levels at the terminal stage. In  
207 contrast, the population of cleaved caspase-3 (cCaspase-3)-positive cells in the tumors treated with  
208 ADC **1** ( $9.4 \pm 2.8\%$ ) was significantly higher than that in the tumors treated with vehicle ( $1.1 \pm 0.1\%$ ,  $P =$   
209  $0.0064$ ) or Cys conjugate **2** ( $2.8 \pm 0.6\%$ ,  $P = 0.0333$ , **Figure 3H**), suggesting that homogeneous ADC **1**  
210 induced apoptosis more effectively than heterogeneous ADC **2** over the course of the study. Given that  
211 the histopathology analysis was performed at the terminal stage of each group, more significant  
212 differences in Ki67 and cCaspase-3 levels could have been observed at the same time point in the  
213 early stage. Collectively, these results demonstrate that homogeneous ADC **1** can eradicate intracranial  
214 GBM tumors more efficiently than its heterogeneous variants.



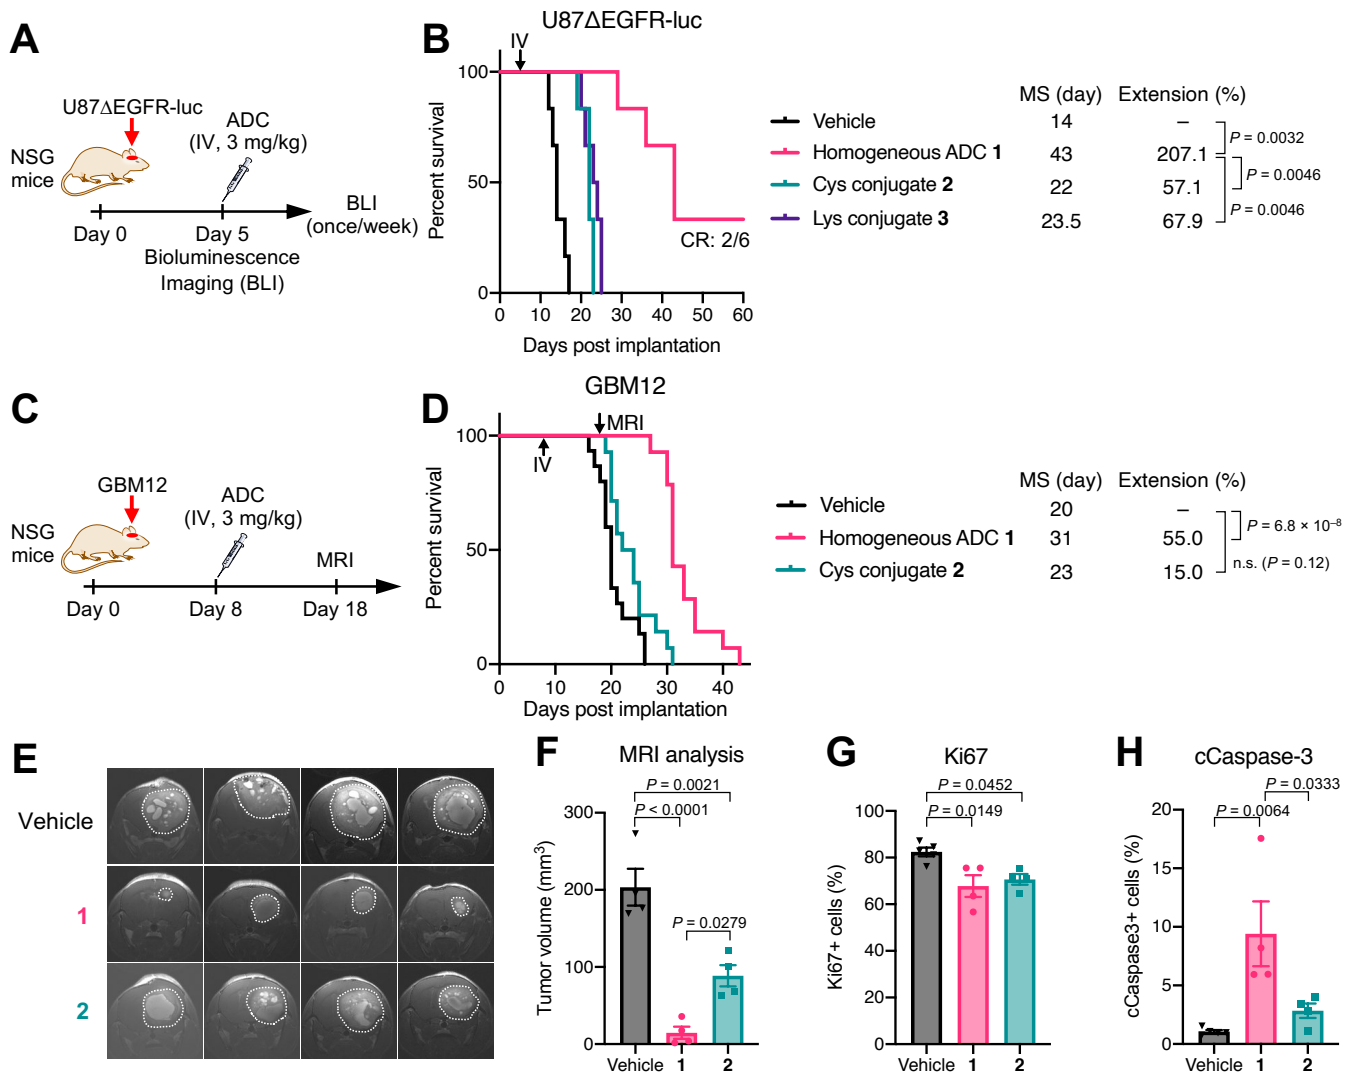

215

216 **Figure 3.** ADC homogeneity enhances therapeutic efficacy in orthotopic GBM mouse models. **A** Study  
217 schedule in the U87ΔEGFR-luc xenograft model. Male and female NSG mice were intracranially  
218 implanted with U87ΔEGFR-luc cells. Five days after tumor implantation, each group was treated with a  
219 single intravenous administration of each ADC at 3 mg/kg and monitored by BLI once a week. **B**  
220 Survival curves in the U87ΔEGFR-luc model (n = 6/group). Vehicle (black), homogeneous ADC 1  
221 (magenta), Cys conjugate 2 (green), and Lys conjugate 3 (purple). Two out of six mice treated with  
222 homogeneous ADC 1 survived over 60 days without detectable tumor-derived bioluminescence  
223 signal. All animals other than the ones that were found dead or achieved complete remission were  
224 euthanized at the pre-defined humane endpoint, which were counted as deaths. **C** Study schedule in  
225 the GBM12 PDX model. Tumor-bearing NSG mice were treated with ADC 1 or 2 at 3 mg/kg 8 days  
226 post-implantation. MRI was performed on Day 18. **D** Survival curves in the GBM12 model (n = 15 for  
227 vehicle; n = 14 for ADCs). **E** Coronal MRI images on Day 18 (n = 4). Tumor lesions are indicated with  
228 white dots. **F** Estimated tumor volume by MRI image-based quantification (n = 4). **G** Population of Ki67-

229 positive cells in the GBM12 tumors harvested at the terminal stage (n = 5 for vehicle, n = 4 for ADCs).  
230 **H** Population of cCaspase-3-positive cells in the GBM12 tumors harvested at the terminal stage (n = 5  
231 for vehicle, n = 4 for ADCs). Data are presented as mean values  $\pm$  SEM. Kaplan-Meier survival curve  
232 statistics were analyzed with a log-rank test. To control the family-wise error rate in multiple  
233 comparisons, crude *P* values were adjusted by the Bonferroni method. For MRI and tissue analysis, a  
234 one-way ANOVA with a Tukey-Kramer post hoc test was used (see **Table S4** for details). BLI,  
235 bioluminescence imaging; cCaspase-3, cleaved caspase-3; CR, complete remission; MRI, magnetic  
236 resonance imaging; MS, median survival; PDX, patient-derived xenograft.

237

### 238 **Homogeneity also improves *in vivo* therapeutic efficacy of other ADCs for EGFRvIII- and HER2-** 239 **positive brain tumors**

240 To generalize our findings, we tested other homogeneous ADCs for treatment efficacy in orthotopic  
241 brain tumor models. To this end, homogeneous anti-EGFRvIII ADC **4** (DAR 4) and heterogeneous  
242 variant **5** (Lys conjugate, average DAR: 4.7) were constructed from N297A depatuxizumab, the parent  
243 mAb of Depatux-M (Phillips et al., 2016) (**Figure S5A**). Both ADCs showed comparable cell killing  
244 potency in EGFRvIII-positive U87 $\Delta$ EGFR-luc cells (EC<sub>50</sub> values: 0.15 nM, homogeneous ADC **4** and  
245 0.26 nM, Lys conjugate **5**, **Figure S5B**). Subsequently, NSG mice bearing intracranial U87 $\Delta$ EGFR-luc  
246 tumors were treated with a single dose of each ADC at 3 mg/kg 5 days after tumor implantation (**Figure**  
247 **4A**). Homogeneous ADC **4** showed a remarkable survival benefit (median survival: >60 days). Four out  
248 of six mice treated with homogeneous ADC **4** survived over the course of the study. In addition, MRI on  
249 Day 61 showed no detectable brain tumor lesion in these survivors, indicating complete remission  
250 (**Figure S5C**). In contrast, heterogeneous variant **5** extended median survival time (33 days) less  
251 significantly than homogeneous ADC **4** (*P* = 0.0195, **Figure 4B**).

252



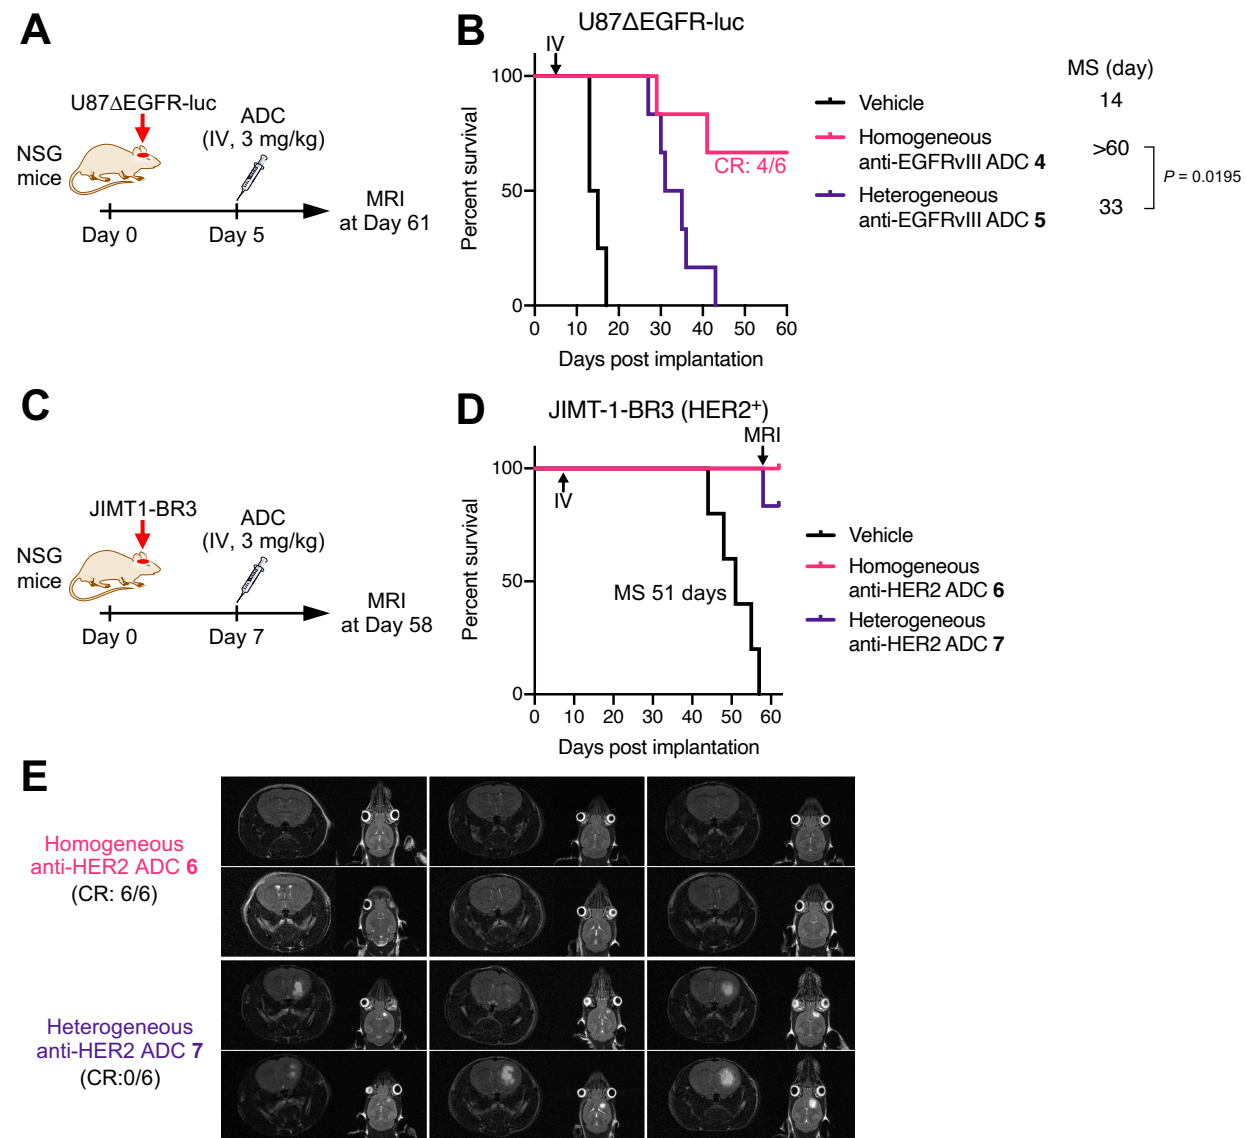

253

254 **Figure 4.** Homogeneous depatuxizumab- and trastuzumab-based ADCs show enhanced therapeutic  
 255 efficacy in orthotopic brain tumor mouse models. **A** Study schedule in the orthotopic U87 $\Delta$ EGFR-luc  
 256 xenograft mouse model. Male and female NSG mice were intracranially implanted with U87 $\Delta$ EGFR-luc  
 257 cells. Five days after tumor implantation, each group was treated with a single intravenous  
 258 administration of each depatuxizumab-based anti-EGFRvIII ADC at 3 mg/kg. MRI was performed on  
 259 Day 61. **B** Survival curves in the U87 $\Delta$ EGFR-luc model. Vehicle (black, n = 4), homogeneous ADC **4**  
 260 (magenta, n = 6), and heterogeneous Lys conjugate **5** (purple, n = 6). Four out of six mice treated with  
 261 homogeneous ADC **4** survived over 60 days without detectable tumor lesions (**Figure S5C**). All animals  
 262 other than the ones that were found dead or achieved complete remission were euthanized at the pre-  
 263 defined humane endpoint, which were counted as deaths. **C** Study schedule for the intracranially  
 264 implanted JIMT1-BR3 tumor mouse model. NSG mice bearing intracranial JIMT-1-BR3 tumors were

265 injected intravenously with a single dose of each trastuzumab-based anti-HER2 ADC at 3 mg/kg 7 days  
266 post-implantation. MRI was performed on Day 58. **D** Survival curves in the JIMT-1-BR3 model (n = 6).  
267 Vehicle (black), homogeneous anti-HER2 ADC **6** (magenta), and heterogeneous Lys conjugate **7**  
268 (purple). **E** Coronal and sagittal MRI images of the intracranial JIMT-1-BR3 tumor-bearing mice on Day  
269 58. Brain tumor lesions were detected in the mice treated with heterogeneous ADC **7** (CR: 0/6) but not  
270 in those treated with homogeneous ADC **6** (CR: 6/6). Kaplan-Meier survival curve statistics were  
271 analyzed with a log-rank test (see **Table S4** for details).

272

273 Next, we performed similar *in vitro* and *in vivo* studies using a HER2-positive brain tumor model.  
274 Brain metastasis is observed in 25–50% patients with advanced HER2-positive breast tumors (Zimmer  
275 et al., 2020), representing a difficult-to-treat population. We prepared anti-HER2 homogeneous ADC **6**  
276 (DAR 4) and a heterogeneous variant (Lys conjugate **7**, average DAR: 4.2) from N297A trastuzumab  
277 and evaluated their cell killing potency in HER2-positive JIMT-1-BR3 cells (**Figures S6A** and **S6B**).  
278 JIMT-1-BR3 is a HER2-positive breast cancer cell line established from a subpopulation of the parent  
279 JIMT-1 cells that metastasized to the brain in a rodent model (Palmieri et al., 2014). Both ADCs  
280 efficiently killed JIMT-1-BR3 cells with comparable EC<sub>50</sub> values (homogeneous ADC **6**: 0.037 nM, Lys-  
281 conjugate **7**: 0.059 nM, **Figure S6B**). Subsequently, NSG mice bearing intracranial JIMT-1-BR3 tumors  
282 were injected intravenously with each ADC at 3 mg/kg 7 days post tumor implantation (**Figure 4C**).  
283 Most mice in both ADC groups survived over the course of the study (Homogeneous ADC **4**: all mice,  
284 heterogeneous ADC **5**: 5 out of 6 mice), while the median survival time without treatment was 51 days  
285 (**Figure 4D**). However, MRI on Day 58 revealed a clear difference in efficacy between these two ADC  
286 groups; tumor lesions were detected in all mice treated with heterogeneous ADC **7** but not in those  
287 treated with homogeneous ADC **6** (**Figure 4E**). Hematoxylin and eosin (H&E) staining of the brain  
288 tissues also validated this observation (**Figure S6C**). Collectively, these findings strongly support our  
289 hypothesis that the use of homogeneous ADCs can lead to significantly improved treatment outcomes  
290 in a broad range of brain tumors compared to heterogeneous ADC-based treatment.

291

292 **Clearance and linker stability in circulation are not the primary factors reducing the efficiency in**  
293 **payload delivery to brain tumors**

294 To understand how the antibody–drug conjugation modality impacts overall efficacy in the treatment  
295 of brain tumors, we set out to assess *in vivo* pharmacokinetic (PK) profiles of selected ADCs.  
296 Homogeneous anti-EGFR ADC **1**, heterogeneous Cys conjugate **2**, heterogeneous Lys conjugate **3**, or  
297 the parental anti-EGFR mAb (3 mg/kg) was intravenously administered into CD-1 mice<sup>®</sup>. Subsequently,  
298 blood samples were periodically collected. The concentrations of both total mAb and intact ADC were  
299 then determined by sandwich ELISA. In total mAb analysis, homogeneous ADC **1** and Lys conjugate **3**  
300 showed half-lives at the elimination phase ( $t_{1/2\beta}$  = 9.8 days, ADC **1** and  $t_{1/2\beta}$  = 10.4 days, Lys conjugate  
301 **3**) comparable with that of the unmodified mAb (10.9 days), whereas Cys conjugate **2** showed a slightly  
302 decreased half-life ( $t_{1/2\beta}$  = 7.8 days, **Figure 5A** and **Table S3**). We found that Cys conjugate **2** showed  
303 thermal instability after a 28-day incubation under physiological conditions probably due to partly  
304 cleaved interchain disulfide bonds (**Figure S2C**). This instability may account for the increased  
305 clearance rate. In intact ADC analysis, no significant decrease in half-lives was observed for  
306 homogeneous ADC **1** ( $t_{1/2\beta}$  = 8.6 days) or Lys conjugate **3** ( $t_{1/2\beta}$  = 8.9 days), indicating that there was  
307 almost no premature release of MMAF during circulation (**Figure 5B** and **Table S3**). In contrast, the  
308 concentration of intact Cys conjugate **2** declined at a faster rate ( $t_{1/2\beta}$  = 4.2 days), indicating that the  
309 conjugated MMAF was partly lost in circulation. Previous reports have shown that cysteine-containing  
310 serum proteins such as albumin promote dissociation of cysteine–maleimide linkage within ADCs  
311 through a thiol exchange reaction, leading to partial deconjugation of payloads in circulation (Lyon et  
312 al., 2014; Tumey et al., 2014).

313

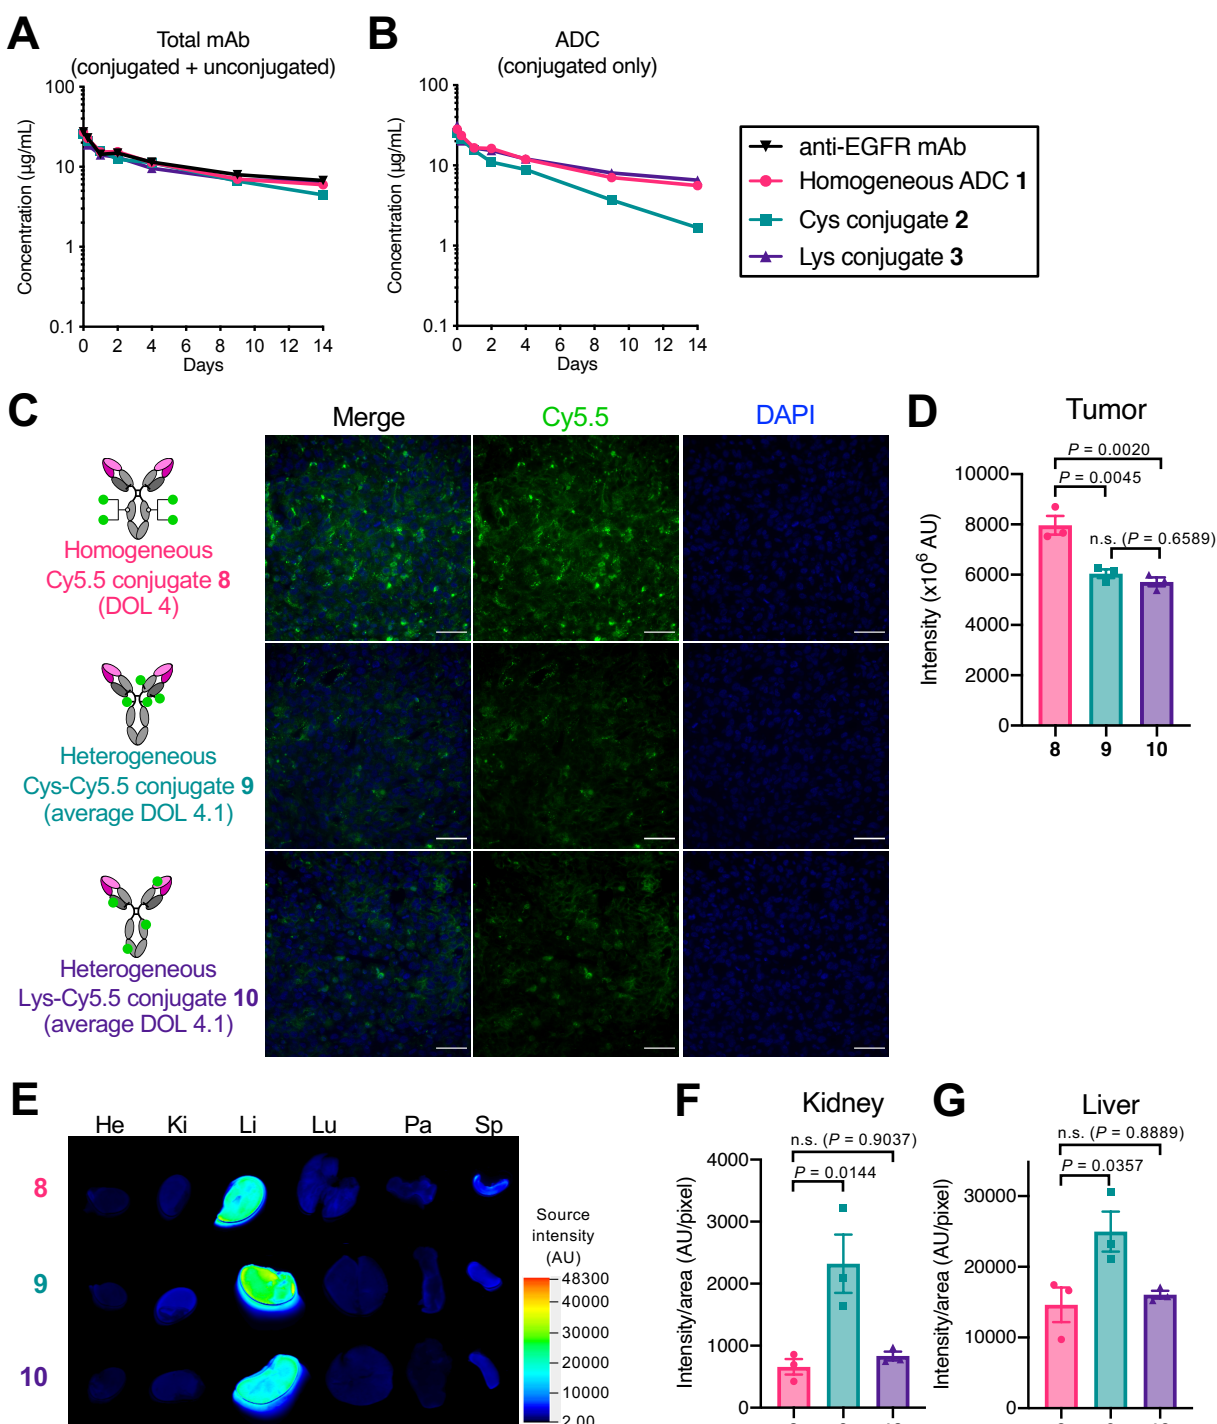

314

315 **Figure 5.** Promoted clearance and premature payload loss in circulation are not the primary factors  
 316 attenuating the brain tumor-targeting efficiency of ADCs. **A,B** PK of unmodified N88A/N297A anti-  
 317 EGFR mAb (black inverted triangle), homogeneous ADC 1 (magenta circle), Cys conjugate 2 (green  
 318 square), and Lys conjugate 3 (purple triangle) in female CD-1<sup>®</sup> mice (n = 3). At the indicated time  
 319 points, blood was collected to quantify total antibody (conjugated and unconjugated, **A**) and intact ADC  
 320 (conjugated only, **B**) by sandwich ELISA. **C** Fluorescence images of brain tumor tissues harvested 48

321 hours after injecting each Cy5.5 conjugate (n = 3, scale bar: 50  $\mu$ m). **D** Semi-quantification of the Cy5.5  
322 signal detected in the brain tumor tissues. Three regions of interest (ROI) were randomly selected in  
323 each tissue sample to calculate signal intensity. **E** Ex vivo fluorescence images of the other organs (He,  
324 heart; Ki, kidney; Li, liver; Lu, lung; Pa, pancreas; Sp, spleen) detected using a 700 nm channel (n = 3).  
325 **F, G** Semi-quantification of the Cy5.5 signal detected in the kidneys and liver. A representative image  
326 from each group is shown in all panels of fluorescence images. Data are presented as mean values  $\pm$   
327 SEM. For statistical analysis, a one-way ANOVA with a Tukey-Kramer post hoc test was used (see  
328 **Table S4** for details). DOL, degree of labeling.

329

330 As demonstrated above, promoted clearance and payload deconjugation may partly account for the  
331 poor treatment efficacy observed for Cys conjugate **2** in the orthotopic GBM models. However, these  
332 factors are likely irrelevant to the inferior efficacy observed for the lysine conjugates, which were  
333 designed not to show thermal instability or undergo deconjugation in circulation. To uncover other  
334 contributing factors, we performed a biodistribution study using the orthotopic U87 $\Delta$ EGFR-luc xenograft  
335 mouse model. As surrogates of the ADCs we used earlier, the following fluorescent dye conjugates  
336 were prepared from the N88A/N297A cetuximab: homogeneous Cy5.5 conjugate **8** (degree of labeling  
337 or DOL: 4) and two heterogeneous Cy5.5 conjugates by cysteine–maleimide coupling (Cys-Cy5.5  
338 conjugate **9**, average DOL: 4.1) and lysine coupling (Lys-Cy5.5 conjugate **10**, average DOL: 4.1,  
339 **Figures S7A–C**). We synthesized and used DBCO–EVCit–Cy5.5 module to construct homogeneous  
340 conjugate **8** (see Supplementary Information for synthesis details). In all cases, Cy5.5 was incorporated  
341 as a payload surrogate into the parent mAb with the same linkers and conjugation chemistries that  
342 were used to prepare corresponding ADCs. Orthotopic U87 $\Delta$ EGFR-luc tumor-bearing NSG mice were  
343 administered intravenously with each dye conjugate at 3 mg/kg 5 days post tumor implantation. Two  
344 days after administration, all animals underwent cardiac perfusion for removing conjugates circulating  
345 or bound to the vascular endothelial cells. We then harvested major organs including tumor-bearing  
346 brains. Fluorescence imaging revealed that homogeneous Cy5.5 conjugate **8** accumulated in the brain  
347 tumors more effectively than heterogeneous conjugates **9** ( $P = 0.0045$ ) and **10** ( $P = 0.0020$ , **Figures 5C**  
348 **and 5D**). We did not see a significant difference in intracranial U87 $\Delta$ EGFR-luc tumor targeting ability

349 between Cys conjugate **9** and Lys conjugate **10**. We also confirmed in a separate biodistribution study  
350 that the cathepsin-responsive cleavage EVCit linker did not significantly contribute to the enhanced  
351 accumulation in U87 $\Delta$ EGFR-luc tumors (**Figures S7D and S7E**). Cys-Cy5.5 conjugate **9** showed an  
352 increased fluorescent signal in the kidneys and liver compared to homogeneous Cy5.5 conjugate **8**  
353 (kidneys:  $P = 0.0144$ , liver:  $P = 0.0357$ ), due probably to partial deconjugation of the maleimide-Cy5.5  
354 modules in circulation and following hepatic and renal clearance (**Figures 5E–G**). However, we did not  
355 observe such increased liver and kidney accumulation for Lys-Cy5.5 conjugate **10**. Taken together,  
356 these findings suggest that promoted clearance of conjugated payloads and linker instability are not the  
357 primary factors attenuating the brain tumor-targeting efficiency.

358

### 359 **Homogeneous conjugation enables efficient payload delivery to intracranial tumors for days**

360 We performed longitudinal intravital imaging to clarify spatiotemporal changes in the accumulation  
361 of payloads in brain tumors. GBM12 cells that stably express Red Fluorescent Protein (GBM12-RFP)  
362 were implanted into NSG mice intracranially, and either Cy5.5 conjugate **8**, **9**, or **10** was administered  
363 intravenously at 3 mg/kg 14 days post-implantation (**Figure 6A**). Fluorescence images were then taken  
364 at multiple time points through a cranial window. As demonstrated by the increasing RFP signals, the  
365 implanted tumors continued to grow throughout the study (**Figures 6B–D**). To offset the intragroup and  
366 intergroup variances derived from tumor growth, the Cy5.5 signal intensity was normalized to the RFP  
367 signal intensity at each time point. The intratumor concentrations of the three conjugates peaked  
368 around Day 3 post-administration and then declined over time (**Figure 6E**). Notably, homogeneous  
369 conjugate **8** accumulated in the orthotopic GBM12 tumors more significantly and persistently than  
370 heterogeneous variants **9** and **10**; the statistically significant enhancement was observed for up to 5  
371 days (**Figure 6E**). Overall, these results suggest that homogeneous conjugation allows intravenously  
372 administered antibody conjugates to target brain tumors with enhanced payload delivery efficiency and  
373 durability.



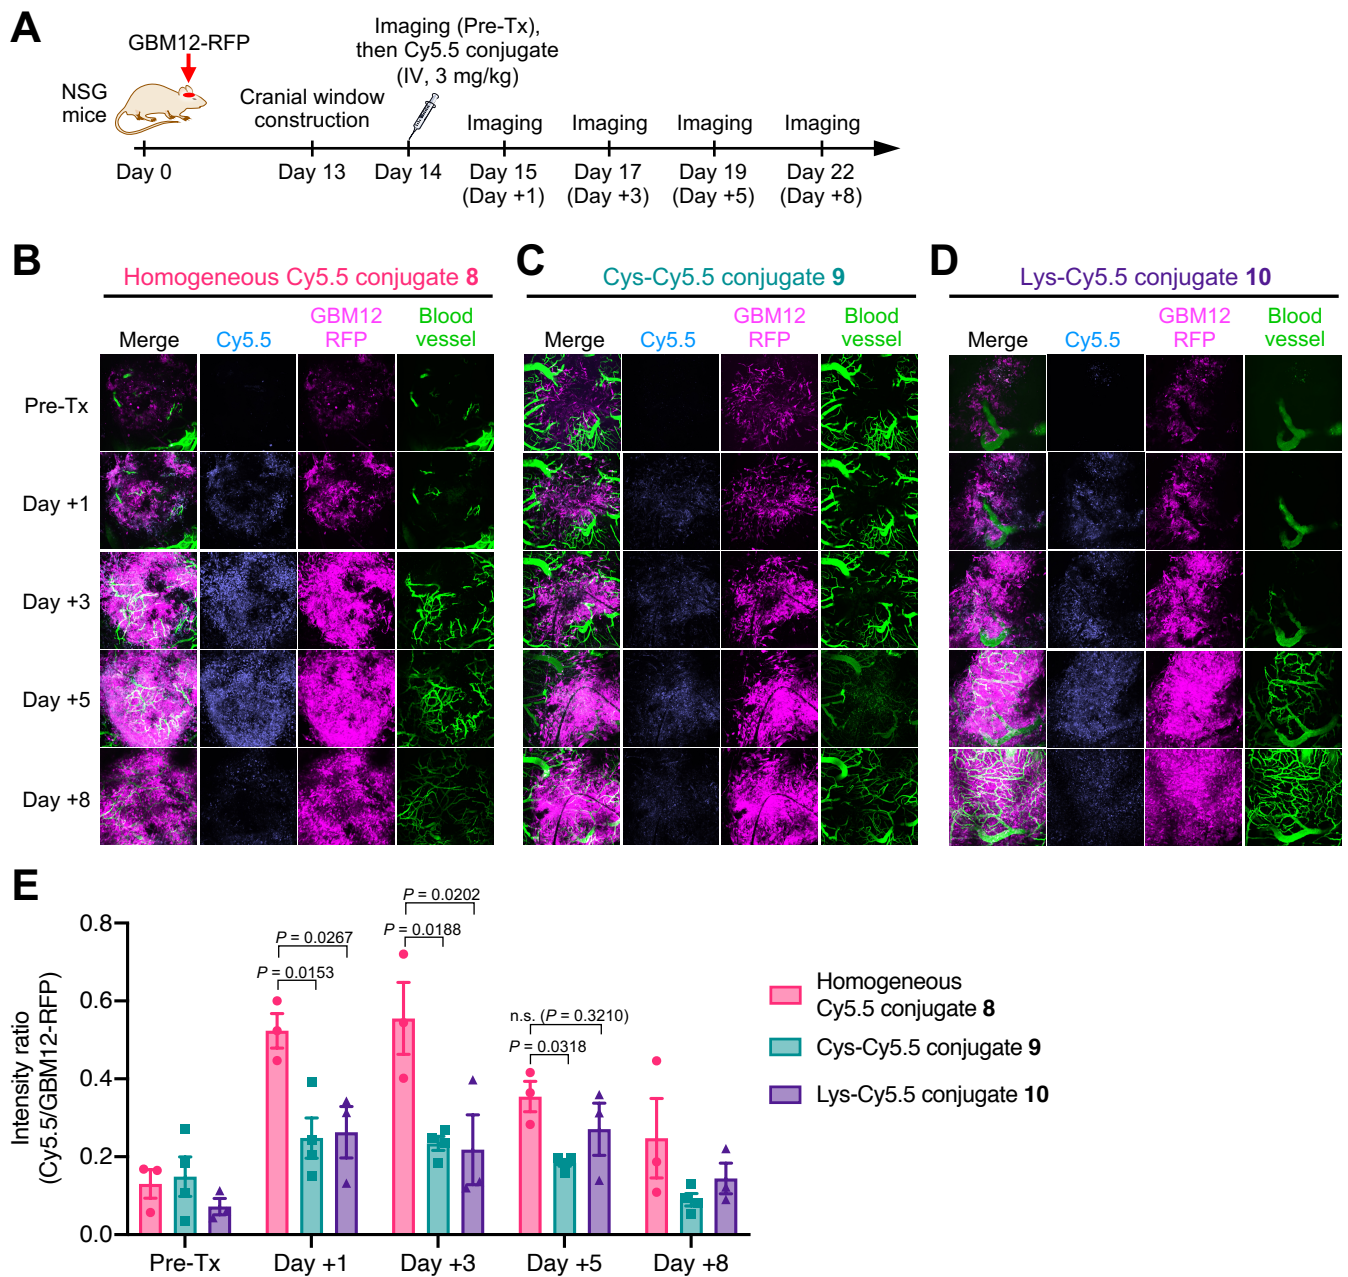

374

375 **Figure 6.** Homogeneous conjugation allows for enhanced payload delivery to orthotopically  
 376 xenografted GBM tumors for several days. **A** Study schedule for intravital imaging. Male NSG mice  
 377 were intracranially implanted with GBM12-RFP cells. Thirteen days after tumor implantation, a cranial  
 378 window was constructed in each animal. Next day, each group was then injected intravenously with a  
 379 single dose of each Cy5.5 conjugate at 3 mg/kg. Fluorescence images were taken before  
 380 administration (Pre-Tx) and on Day 1, 3, 5, and 8 post-administration. FITC-conjugated dextran was  
 381 injected right before each imaging session to visualize the brain microvasculature. **B** Intravital images  
 382 of GBM12-RFP tumors treated with homogeneous Cy5.5 conjugate 8 (n = 3). A representative image at  
 383 each time point is shown. **C** Intravital images of GBM12-RFP tumors treated with Cys-Cy5.5 conjugate

384 **9** ( $n = 4$ ). A representative image at each time point is shown. **D** Intravital images of GBM12-RFP  
385 tumors treated with Lys-Cy5.5 conjugate **10** ( $n = 3$ ). A representative image at each time point is  
386 shown. Cy5.5, cyan; RFP, magenta; FITC, green. **E** Normalized Cy5.5 intensity (Cy5.5 signal/GBM12-  
387 RFP signal). Data are presented as mean values  $\pm$  SEM. For statistical analysis, a one-way ANOVA  
388 with a Dunnett's post hoc test (control: homogeneous conjugate **8**) was used (see **Table S4** for details).  
389

### 390 **High-DAR components in heterogeneous MMAF ADCs target brain tumors less efficiently than** 391 **low-DAR components**

392 Finally, we set out to clarify underlying mechanisms attenuating the brain tumor targeting efficiency  
393 of heterogeneous ADCs. To investigate how each DAR component could affect biodistribution profiles,  
394 we prepared depatuzizumab-based MMAF ADCs with DARs of 4, 6, and 8 using our branched linkers  
395 and non-cleavable BCN-MMAF (see Supplementary Information for synthesis details). The parent  
396 N297A depatuzizumab was used as a DAR 0 control. These anti-EGFRvIII mAbs and conjugates were  
397 then labeled with Cy5.5 NHS ester at DOL of 2.3–2.5 to afford DAR 0 mAb **11**, DAR 4 ADC **12**, DAR 6  
398 ADC **13**, and DAR 8 ADC **14** (**Figures 7A** and **S8**). Cy5.5 was installed directly onto the mAb scaffold  
399 so that the fluorescent signal would represent the localization of the entire ADC molecule. The  
400 fluorescent conjugates (3 mg/kg) were injected intravenously into NSG mice bearing orthotopic  
401 U87 $\Delta$ EGFR-luc tumors on Day 5 post tumor implantation. After blood collection and cardiac perfusion  
402 at 48 h, major organs were harvested for fluorescence imaging. DAR 0 and DAR 4 conjugates **11** and  
403 **12** showed similar levels of brain tumor accumulation (**Figures 7B** and **7C**). In contrast, compared with  
404 DAR 4 ADC **12**, markedly attenuated brain tumor accumulation was observed for DAR 6 ADC **13** ( $P =$   
405  $0.0396$ ) and DAR 8 ADC **14** ( $P = 0.0288$ ). Although ADCs **12–14** accumulated in the liver more  
406 significantly than DAR 0 mAb **11**, the degrees of liver accumulation and biodistribution patterns of these  
407 ADCs were similar and irrespective of DAR (**Figures 7D** and **7E**). In addition, the concentrations of  
408 DAR 4 and 6 ADCs **12** and **13** in blood were in a similar range and slightly below that of DAR 0 mAb **11**  
409 (**Figure 7F**). DAR 8 ADC **14** underwent accelerated clearance from the circulation probably because of  
410 greatly increased hydrophobicity. Collectively, these results demonstrate that high DAR components



411 comprising a given heterogeneous ADC can show poor brain tumor targeting compared to components  
 412 with optimal or low DARs, leading to reduced payload delivery efficiency.

413

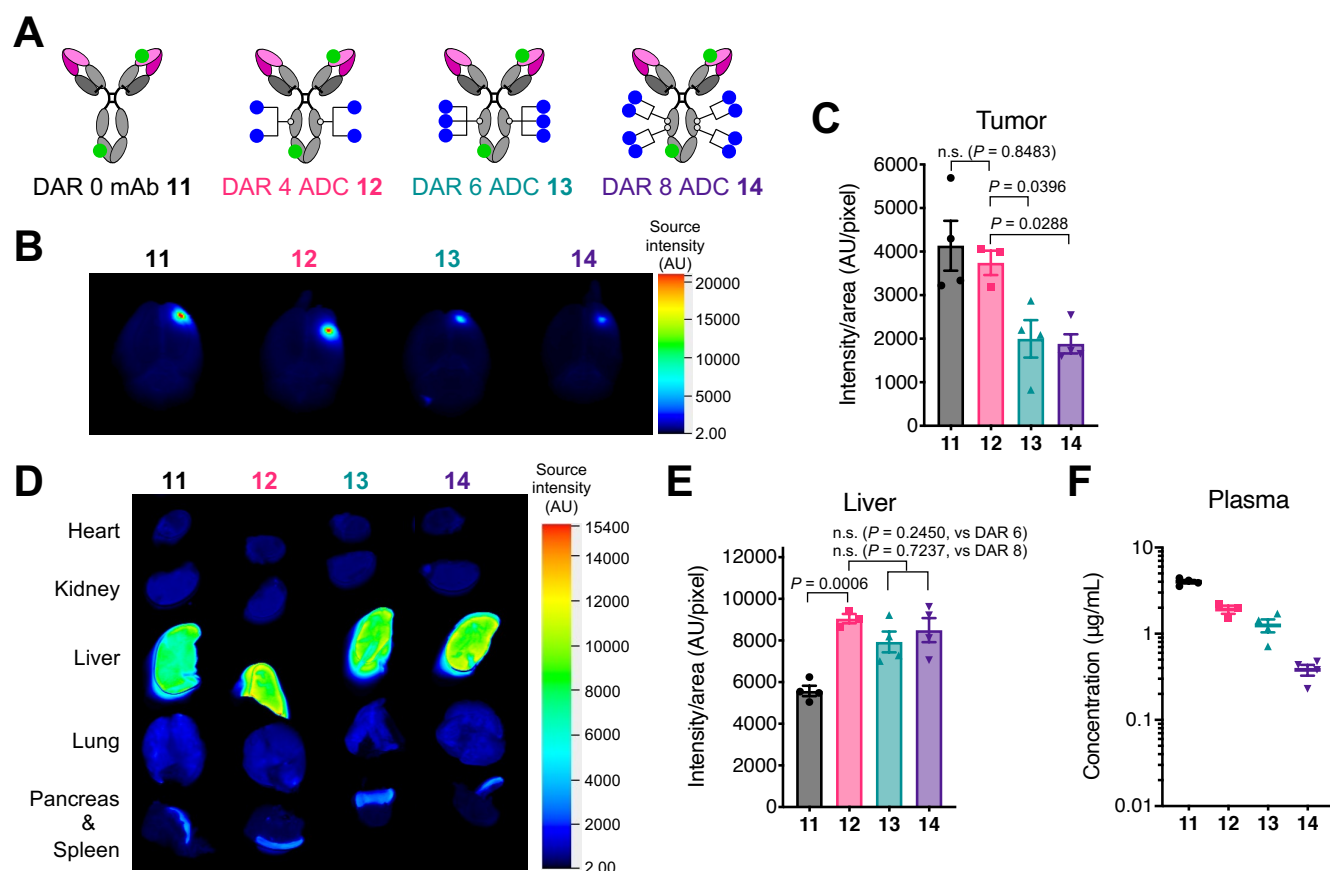

414

415 **Figure 7.** High-DAR components in heterogeneous ADCs target brain tumors less efficiently than  
 416 components with optimal or low DAR. **A** Structures of fluorescently labeled anti-EGFRvIII ADCs  
 417 equipped MMAF (blue circle) at DARs of 0, 4, 6, and 8. Cy5.5 (green circle) was conjugated by lysine  
 418 coupling at DOL of 2.3–2.5. **B** Ex vivo fluorescence images of whole brains harvested from NSG mice  
 419 bearing orthotopic U87 $\Delta$ EGFR-luc tumors 48 hours after intravenous injection of each fluorescent ADC  
 420 ( $n = 3$  for DAR 4 ADC **12**;  $n = 4$  for all other groups). Images were taken using a 700 nm channel. **C**  
 421 Semi-quantification of the Cy5.5 signal derived from the tumor lesions in the whole brains. DAR 0 mAb  
 422 **11** (black), DAR 4 ADC **12** (magenta), DAR 6 ADC **13** (green), and DAR 8 ADC **14** (purple). **D** Ex vivo  
 423 fluorescence images of other major organs. **E** Semi-quantification of the Cy5.5 signal detected in the  
 424 liver. **F** Concentrations in plasma. Blood was collected 48 h post ADC injection (right before cardiac  
 425 perfusion) to quantify total antibody by sandwich ELISA. A representative image from each group is  
 426 shown in all panels of fluorescence images. Data are presented as mean values  $\pm$  SEM. For statistical

427 analysis, a one-way ANOVA with a Dunnett's post hoc test (control: DAR 4 ADC **12**) was used (see  
428 **Table S4** for details).

429

## 430 **DISCUSSION**

431 We have investigated how ADC homogeneity impacts therapeutic efficacy and survival extension in  
432 orthotopic brain tumor models. Our stepwise conjugation method (i.e., MTGase-mediated site-specific  
433 linker conjugation and following click reaction) efficiently generated homogeneous ADCs targeting  
434 EGFR, EGFRvIII, and HER2. We tested these homogeneous ADCs and their heterogeneous variants  
435 prepared by conventional lysine or cysteine coupling for antiproliferative effect against brain tumor cells.  
436 In vitro, all DAR-matched ADCs showed comparable antigen-specific binding and cell killing potency  
437 irrespective of ADC homogeneity, conjugation method, or linker cleavability. However, we obtained  
438 contrasting results *in vivo*; all homogeneous ADCs exerted far better survival benefits in both cell line-  
439 derived xenograft and PDX orthotopic brain tumor models than could be achieved by corresponding  
440 heterogeneous variants, including a Depatux-M surrogate. Notably, a single dose of our homogeneous  
441 ADCs at 3 mg/kg provided complete remission in the orthotopic U87 $\Delta$ EGFR-luc (2 out of 6 mice by anti-  
442 EGFR ADC **1**; 4 out of 6 mice by anti-EGFRvIII ADC **4**) and JIMT1-BR3 models (6 out of 6 mice by  
443 anti-HER2 ADC **6**), whereas DAR-matched heterogeneous ADCs did not in either case. To delve into  
444 this discrepancy, we performed biodistribution studies using intracranially xenografted GBM models.  
445 Our data from these studies indicate that homogeneous conjugation at optimal DARs likely allows for  
446 enhanced and persistent payload accumulation into intracranial tumors over several days, leading to  
447 improved *in vivo* efficacy. We also confirmed that both cleavable and non-cleavable linkers allowed  
448 homogeneous anti-EGFR conjugates to deliver payloads to intracranial GBM tumors at similar levels.  
449 Collectively, these results demonstrate that ADC homogeneity is a critical factor determining  
450 therapeutic efficacy in the treatment of brain tumors.

451

452 The question we asked next is how ADC homogeneity critically influences systemic payload  
453 delivery to brain tumors. Many studies have shown that homogeneous ADCs provide more favorable

454 therapeutic effects in the treatment of other solid tumors than can be achieved by heterogeneous  
455 variants (Bryant et al., 2015; Junutula et al., 2008, 2010; Lhospipe et al., 2015; Pillow et al., 2014).  
456 Nevertheless, the improvement in therapeutic efficacy observed in our study appears to be much more  
457 prominent compared to those cases. We think that blockage of drug influx by an intact BBB in and  
458 around brain tumors likely answers this question. The BBB was believed to be uniformly and  
459 significantly disrupted in most GBM tumors. Contrary to this previous belief, recent preclinical and  
460 clinical studies have demonstrated that a measurable number of GBM cells, in particular ones near the  
461 growing edge of the infiltrative tumor area, exist behind an intact BBB or partially functional blood–  
462 tumor barrier (BTB) (Arvanitis et al., 2020; Kim et al., 2018; Marin et al., 2021; Sarkaria et al., 2018; van  
463 Tellingen et al., 2015). As such, GBM cells protected by an intact BBB are inaccessible to systemically  
464 administered ADCs. Recently, Sarkaria and co-workers exhaustively validated heterogeneous BBB  
465 disruption in multiple PDX models of GBM, including GBM12 (Marin et al., 2021). They also  
466 demonstrated that the intact BBB likely caused an uneven intracranial distribution of systemically  
467 administered Depatux-M, resulting in insignificant treatment outcomes in 5 out of 7 orthotopic PDX  
468 models. In contrast, they found that Depatux-M exerted remarkable therapeutic effects when tested in  
469 subcutaneous models of the same PDX tumors, in which the BBB did not constitute the tumor  
470 microenvironment. This report highlights the importance of testing ADCs for brain tumor treatment in  
471 clinically relevant orthotopic models rather than subcutaneous models.

472

473 Our findings and the report from the Sarkaria group (Marin et al., 2021) lead to a hypothesis that  
474 high-DAR species included in heterogeneous ADCs cannot be efficiently delivered to intracranial  
475 tumors across the BBB compared to low-DAR species. Consequently, the effective DAR (i.e., DARs  
476 adjusted based on the brain tumor targeting efficiency of each DAR component relative to that of the  
477 unmodified mAb) and payload dose are considerably reduced (**Figure 8**). In contrast, homogeneous  
478 ADCs constructed at optimal DARs likely undergo only marginal impairment in brain tumor targeting,  
479 leading to a minimal reduction in effective payload dose. Indeed, our intravital imaging study showed

480 that the difference in payload dose between heterogeneous and homogeneous ADCs could reach up to  
481 2.5-fold. In general, ADC hydrophobicity increases in proportion to the degree of payload conjugation.  
482 As such, high-DAR ADCs have greater aggregation tendency compared with low-DAR ADCs. In  
483 circulation, such multimolecular complexation may also occur with abundant proteins such as albumin,  
484 resulting in increased apparent hydrodynamic radius (Frka-Petesic et al., 2016). Considering that BBB  
485 permeability declines exponentially with molecular size (Li et al., 2016), we speculate that an increase  
486 in apparent hydrodynamic radius is disadvantageous for delivering conjugated payloads to brain tumors  
487 across the intact BBB or partially functional BTB. As demonstrated in our treatment study using the  
488 intracranial JIMT-1-BR3 tumor model (i.e., complete remission in all animals by homogeneous ADC **6**  
489 vs no complete remission by heterogeneous ADC **7**), a decrease in the effective DAR by  
490 heterogeneous conjugation could be further prominent in grade 1–3 gliomas and HER2-positive brain  
491 metastatic tumors, in which BBB disruption is less significant than in GBM (Gril et al., 2020; Yonemori  
492 et al., 2010). The use of more hydrophobic payloads than MMAF may also make this effect salient. As  
493 observed in previous studies using other solid tumor models (Hamblett et al., 2004; Lhospice et al.,  
494 2015), clearance and *in vivo* stability of ADCs could also be factors influencing payload delivery  
495 efficiency and overall treatment efficacy in orthotopic brain tumor models. Indeed, we observed  
496 promoted clearance for DAR 8 MMAF ADC **14**. However, DAR 6 ADC **13**, which also showed poor  
497 brain tumor targeting, did not undergo rapid clearance. In addition, the treatment efficacy of  
498 heterogeneous Cys conjugate **2** in the orthotopic U87 $\Delta$ EGFR-luc tumor model was comparable to that  
499 of Lys conjugate **3**, despite its impaired thermal and circulation stability. Overall, these findings support  
500 the conclusion that ADC homogeneity can influence payload delivery to brain tumors across the BBB  
501 more significantly than clearance and *in vivo* stability profiles. Future in-depth structural and  
502 mechanistic studies will clarify the validity of our hypothesis in other combinations of mAbs, linker and  
503 conjugation chemistries, and payload types.

504

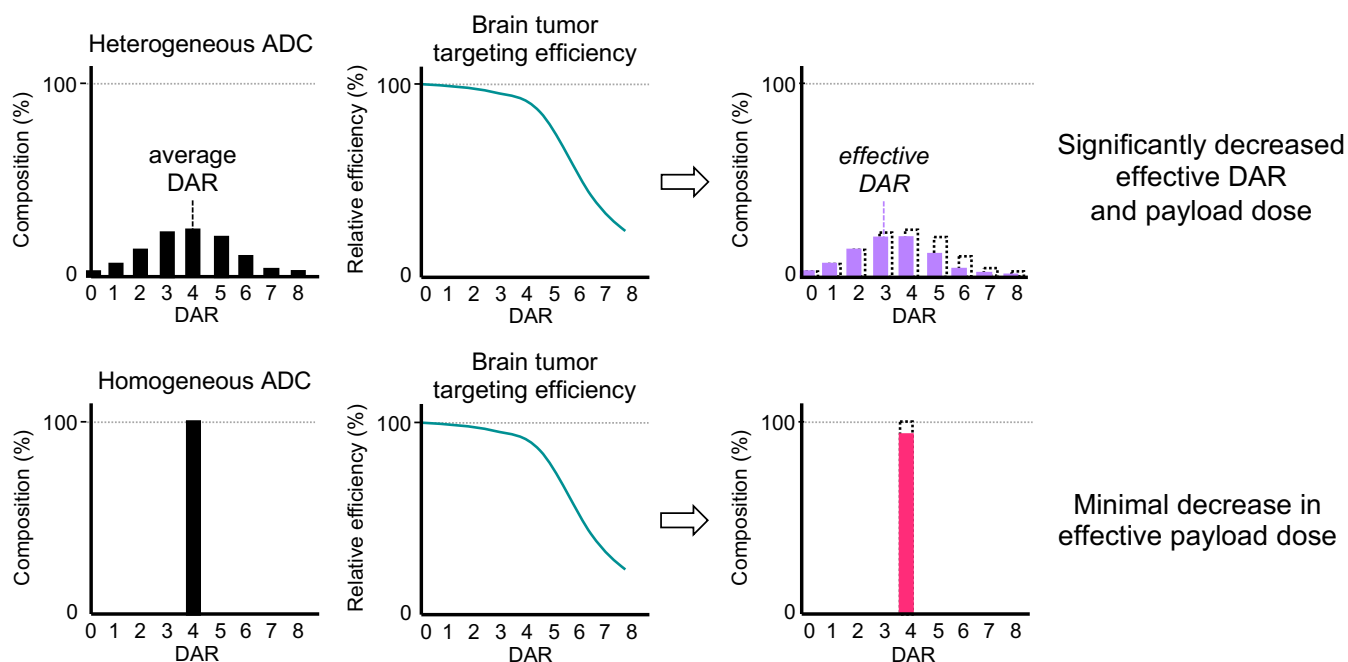

506 **Figure 8.** Reduction in effective DAR and payload dose is more prominent in heterogeneous ADCs  
507 than in homogeneous ADCs. All values used in this figure are estimated values based on the data  
508 shown in **Figures 1** and **7**. Theoretical payload doses of heterogeneous and homogeneous ADCs with  
509 the same (average) DAR are equivalent if administered at the same mAb dose. However, high-DAR  
510 components in heterogeneous ADCs show poor brain tumor targeting, decreasing the effective DAR  
511 and payload dose. Such deterioration is marginal in the case of homogeneous ADCs, leading to  
512 improved payload delivery and overall efficacy.

513

514 In summary, our findings highlight the critical importance of ADC homogeneity in maximizing  
515 efficacy in brain tumor treatment. Employing homogeneous conjugation at optimal DARs with properly  
516 designed linkers could be a promising approach to resurrecting the ADCs for GBM that have failed to  
517 show therapeutic benefits in clinical trials, including Depatux-M. We also envision that initiating  
518 exploration of new ADCs using homogeneous conjugation technologies will help streamline the  
519 optimization of ADC properties (e.g., DAR, hydrophobicity, stability) and effectively expand our  
520 repertoire of promising drug candidates for brain tumors. In addition to this updated molecular design  
521 guideline, further understanding of brain tumor biology and pathophysiology will also be crucial to  
522 identify promising combinations of antibody targets, ADC linker properties (e.g., structure, drug release  
523 mechanism), and payload types. In particular, deeper understanding of the integrity and functions of the

524 BBB found in patient-derived brain tumor samples could open up the next step to improving payload  
525 delivery efficiency. We believe that such multifaceted approaches will finally lead us to novel ADCs or  
526 other targeted therapy modalities with the potential to conquer GBM and other intractable brain tumors.

527

## 528 **ACKNOWLEDGEMENTS**

529 We gratefully acknowledge the following researchers for providing the cells used in this study:  
530 U87 $\Delta$ EGFR from Dr. Erwin G. Van Meir (Emory University), Gli36 $\delta$ EGFR from Dr. E. Antonio Chiocca  
531 (Brigham and Women's Hospital), JIMT-1-BR3 from Dr. Patricia S. Steeg (the National Cancer  
532 Institute), and GBM12 from Dr. Jann N. Sarkaria (Mayo Clinic). We thank Dr. Chisato M. Yamazaki for  
533 providing scientific input and Mr. Travis J. Roeder for technical assistance. This work was supported by  
534 the National Institutes of Health (R35GM138264 to K.T.; R61NS112410 and P01CA163205 to B.K.),  
535 the Department of Defense Breast Cancer Research Program (W81XWH-18-1-0004 and W81XWH-19-  
536 1-0598 to K.T.), the Cancer Prevention and Research Institute of Texas (RP150551 and RP190561 to  
537 Z.A.), the Welch Foundation (AU-0042-20030616 to Z.A.), and the Japan Society for the Promotion of  
538 Science (postdoctoral fellowship to Y.A. and A.Y.).

539

## 540 **AUTHOR CONTRIBUTIONS**

541 Conceptualization, K.T.; Methodology, Y.A., Y.O., W.X., N.Z., Z.A., B.K., and K.T.; Validation, Y.A.,  
542 Y.O., and W.X.; Formal Analysis, Y.A., Y.O., S.Y.Y.H; Investigation, Y.A., Y.O., W.X., S.Y.Y.H, A.Y.,  
543 and K.T.; Resources, N.Z., Z.A., B.K., and K.T.; Writing – Original Draft, Y.A., Y.O., and K.T.; Writing –  
544 Review & Editing, Y.A., Y.O., A.Y., Z.A., and K.T.; Visualization, Y.A. and Y.O.; Supervision, K.T.;  
545 Project Administration, K.T.; Funding Acquisition, Y.A., A.Y., Z.A., B.K., and K.T.

546

547

548

549

## 550 **DECLARATION OF INTERESTS**

551 Y.A., N.Z., Z.A., and K.T. are named inventors on a patent application relating to the work filed by the  
552 Board of Regents of the University of Texas System (PCT/US2018/034363; US-2020-0115326-A1;  
553 EU18804968.8-1109/3630189). The remaining authors declare no competing interests.

554

## 555 **METHODS**

### 556 **Compounds and antibody conjugates**

557 See Supplementary Information for synthesis details and characterization data of all compounds used  
558 in this study.

559

### 560 **Antibodies**

561 Anti-EGFR, anti-EGFRvIII, and anti-HER2 IgG1 mAbs with N88A/N297A, N297A, or N297Q mutation  
562 were expressed in-house (see below). The other antibodies used in this study were purchased from  
563 commercial vendors as follows: Rabbit anti-MMAF antibody (LEV-PAF1) from Levena Biopharma; goat  
564 anti-human IgG Fab-horseradish peroxidase (HRP) conjugate (109-035-097), goat anti-human IgG Fc  
565 antibody (109-005-098), and donkey anti-human IgG-HRP conjugate (709-035-149) from Jackson  
566 ImmunoResearch; goat anti-rabbit IgG–HRP conjugate (32260) from Thermo Fisher Scientific; rabbit  
567 anti-cleaved caspase 3 antibody (9661S) and rabbit anti-EGFR antibody (4267S) from Cell Signaling  
568 Technology); and rabbit anti-Ki67 antibody (ab16667) from Abcam.

569

### 570 **Expression and purification of human monoclonal antibodies**

571 All human monoclonal antibodies were produced according to the procedure reported previously (Anami  
572 et al., 2017; Shi et al., 2014). Briefly, free style HEK-293 human embryonic kidney cells (Invitrogen)  
573 were transfected with a mammalian expression vector encoding for the human IgG1 kappa light chain  
574 and full-length heavy chain sequences (based on variable sequences of cetuximab, depatuzumab, or  
575 trastuzumab). The transfected HEK-293 cells were cultured in a humidified cell culture incubator at



576 37 °C with 8% CO<sub>2</sub> and shaking at 150 rpm for 7 days before harvesting the culture medium. The  
577 antibody secreted into the culture medium was purified using Protein A resin (GE Healthcare).

578

### 579 **MTGase-mediated antibody–linker conjugation**

580 Anti-EGFR mAb with N88A/N297A double mutations (400 µL in PBS, 5.53 mg/mL, 2.21 mg antibody)  
581 was incubated with the diazide branched linker developed by us previously (Anami et al., 2017, 2018)  
582 (5.9 µL of 100 mM stock in water, 40 equiv.) and Activa TI<sup>®</sup> (101 µL of 40% solution in PBS, Ajinomoto,  
583 purchased from Modernist Pantry) at room temperature for 22 h. The reaction was monitored using  
584 either 1) an Agilent LC-MS system consisting of a 1100 HPLC and a 1946D single quadrupole ESI  
585 mass spectrometer equipped with a MabPac RP column (3 × 50 mm, 4 µm, Thermo Scientific) or 2) a  
586 Thermo LC-MS system consisting of a Vanquish UHPLC and a Q Exactive<sup>™</sup> Hybrid Quadrupole-  
587 Orbitrap<sup>™</sup> Mass Spectrometer equipped with a MabPac RP column (2.1 × 50 mm, 4 µm, Thermo  
588 Scientific). Elution conditions were as follows: mobile phase A = water (0.1% formic acid); mobile phase  
589 B = acetonitrile (0.1% formic acid); gradient over 6.8 min from A:B = 75:25 to 1:99; flow rate = 0.5  
590 mL/min. The conjugated antibody was purified by SEC (Superdex 200 increase 10/300 GL, GE  
591 Healthcare, solvent: PBS, flow rate = 0.6 mL/min) to afford an antibody–linker conjugate [1.91 mg, 86%  
592 yield determined by bicinchoninic acid (BCA) assay].

593

### 594 **Construction of homogeneous ADCs by strain-promoted azide–alkyne cycloaddition**

595 BCN–EVCit–PABC–MMAF (20.7 µL of 3.7 mM stock solution in DMSO, 1.5 equivalent per azide group)  
596 was added to a solution of the mAb–linker conjugate in PBS (460 µL, 4.16 mg/mL), and the mixture  
597 was incubated at room temperature for 22 h. The reaction was monitored using either Agilent LC-MS  
598 system or Thermo LC-MS system equipped with a MabPac RP column (see above) and the crude  
599 products were purified by SEC to afford homogeneous ADC **1** (1.71 mg, 90% yield determined by BCA  
600 assay). Analysis and purification conditions were the same as described above. Homogeneity was



601 confirmed by ESI-MS analysis. Homogeneous anti-EGFRvIII ADC **4** and anti-HER2 ADC **6** were  
602 prepared in the same manner.

603  
604 **Construction of a heterogeneous ADC by cysteine conjugation**

605 Aglycosylated anti-EGFR mAb (298  $\mu$ L in PBS, 3.0 mg/mL, 895  $\mu$ g antibody) was mixed with TCEP  
606 (19.1  $\mu$ L of 1 mM stock solution in water, 3.2 equiv.) and EDTA (30  $\mu$ L of 10 mM stock solution in water,  
607 pH 9, 10% v/v) and incubated at 37 °C for 2 h. MC-MMAF (9.0  $\mu$ L of 10 mM stock solution in DMSO,  
608 15 equiv.) was added to the partially reduced mAb solution and the reaction mixture was incubated  
609 overnight at room temperature. The reaction was monitored using an Agilent 1100 HPLC system  
610 equipped with a MAbPac HIC-Butyl column (4.6  $\times$  100 mm, 5  $\mu$ m, Thermo Scientific). Elution conditions  
611 were as follows: mobile phase A = 50 mM sodium phosphate containing ammonium sulfate (1.5 M) and  
612 5% isopropanol (pH 7.4); mobile phase B = 50 mM sodium phosphate containing 20% isopropanol (pH  
613 7.4); gradient over 25 min from A:B = 99:1 to 1:99; flow rate = 0.8 mL/min. *N*-acetyl cysteine (4.5  $\mu$ L of  
614 100 mM stock solution in DMSO, 75 equiv.) was added to the reaction mixture for quenching the  
615 reaction. The crude products were purified by SEC to afford Cys conjugate **2** (668  $\mu$ g, 75% yield  
616 determined by BCA assay, average DAR: 3.8). SEC purification conditions were the same as described  
617 above. The average DAR value was determined based on UV peak areas in HIC analysis.

618  
619 **Construction of heterogeneous ADCs by lysine conjugation**

620 Aglycosylated anti-EGFR mAb (105  $\mu$ L in PBS, 3.0 mg/mL, 315  $\mu$ g antibody) was mixed with 1 M  
621 phosphate solution at pH 9 (10.5  $\mu$ L) and MMAF-NHS (2.5  $\mu$ L of 10 mM stock solution in DMSO, 12  
622 equiv.) and the mixture was incubated at room temperature for 3 h. The reaction was monitored using  
623 either Agilent LC-MS system or Thermo LC-MS system equipped with a MabPac RP column (see  
624 above). The crude products were purified by SEC to afford Lys conjugate **3** (197  $\mu$ g, 63% yield  
625 determined by BCA assay, average DAR: 3.9). Analysis and purification conditions were the same as  
626 described above. The average DAR value was determined based on ion intensity of each DAR species

627 in ESI-MS analysis. Heterogeneous anti-EGFRvIII ADC **5** and anti-HER2 ADC **7** were constructed in  
628 the same manner.

629

### 630 **Construction of anti-EGFR Cy5.5 conjugates**

631 Cy5.5 conjugates **8–10** were prepared in the same manner as the preparation of corresponding ADCs  
632 described above. Instead of MMAF-containing linker modules, either of the following linker modules  
633 were used: DBCO–EVCit–Cy5.5 (synthesized in house, for homogeneous Cy5.5 conjugate **8**), Cy5.5  
634 maleimide (purchased from Click Chemistry Tools, for Cys-Cy5.5 conjugate **9**), Cy5.5-NHS ester  
635 (purchased from Click Chemistry Tools, for Lys-cy5.5 conjugate **10**), or DBCO–Cy5.5 (purchased from  
636 Click Chemistry Tools, for homogeneous non-cleavable Cy5.5 conjugate). Degrees of labeling (DOL)  
637 were determined by ESI-MS analysis (based on ion intensity of each DOL species) or using a plate  
638 reader (BioTek Synergy HTX) with a standard curve for free Cy5.5 (absorbance at 680 nm).

639

### 640 **Construction of anti-EGFRvIII MMAF-Cy5,5 conjugates**

641 Homogeneous anti-EGFRvIII MMAF ADCs with DARs of 4, 6, and 8 were prepared from  
642 depatuxizumab with an N297A (for DAR 4 and 6) or N297Q mutation (for DAR 8). For the preparation  
643 of the DAR 6 MMAF ADC, the diazido-methyltetrazine tri-arm linker developed by us previously  
644 (Yamazaki et al., 2021) was used. Subsequently, unmodified N297A depatuxizumab (DAR 0) and each  
645 ADC were labeled with Cy5.5-NHS ester (10 mM stock solution in DMSO, 6–8 equiv.) to achieve an  
646 average DOL of 2.3–2.5. The labeling reaction was performed in the same manner as described above,  
647 except that the reaction was quenched with ethanol amine (100 mM stock solution in water, 20 equiv.).  
648 The average DOL values of MMAF-Cy5.5 conjugates **11–14** were determined based on ion intensity of  
649 each DOL species in ESI-MS analysis.

650

651

652

653 **Long-term stability test**

654 Each ADC (1 mg/mL, 10  $\mu$ L) in PBS was incubated at 37 °C for 28 days and stored at -80 °C until use.  
655 Samples were analyzed using an Agilent 1100 HPLC system equipped with a MAbPac SEC-1  
656 analytical column (4.0  $\times$  300 mm, 5  $\mu$ m, Thermo Scientific). The conditions were as follows: flow rate =  
657 0.2 mL/min; solvent = PBS. All assays were performed in triplicate.

658

659 **Cell lines**

660 U87 $\Delta$ EGFR was received from Dr. Erwin G. Van Meir (Emory University). Gli36 $\delta$ EGFR was received  
661 from Dr. E. Antonio Chiocca (Brigham and Women's Hospital, Harvard Medical School). U87 $\Delta$ EGFR-  
662 luc was generated by lentiviral transduction of U87 $\Delta$ EGFR cells using Lentitect<sup>TM</sup> lentiviral particles  
663 encoding for firefly luciferase and a puromycin-resistant gene (GeneCopoeia, LP461-025).  
664 Transduction was performed according to the manufacturer's instruction. U87 $\Delta$ EGFR, U87 $\Delta$ EGFR-luc,  
665 Gli36 $\delta$ EGFR, and HEK293 (ATCC) cells were cultured in DMEM (Corning) supplemented with 10%  
666 EquaFETAL<sup>®</sup> (Atlas Biologicals), GlutaMAX<sup>®</sup> (2 mM, Gibco), and penicillin-streptomycin (penicillin: 100  
667 units/mL; streptomycin: 100  $\mu$ g/mL, Gibco). JIMT1-BR3 was received from Dr. Patricia S. Steeg  
668 (National Cancer Institute) and maintained in RPMI1640 (Corning) supplemented with 10%  
669 EquaFETAL<sup>®</sup>, GlutaMAX<sup>®</sup> (2 mM), sodium pyruvate (1 mM, Corning), and penicillin-streptomycin  
670 (penicillin: 100 units/mL; streptomycin: 100  $\mu$ g/mL). GBM12 was received from Dr. Jann N. Sarkaria  
671 (Mayo Clinic). RFP-expressing GBM12 (GBM12-RFP) was generated by transduction with lentivirus  
672 (System Biosciences, LL110VA-1) according to the manufacturer's instruction. GBM12 and GBM12-  
673 RFP cells were maintained in DMEM supplemented with 2% fetal bovine serum and penicillin-  
674 streptomycin (penicillin: 100 units/mL; streptomycin: 100  $\mu$ g/mL). All cells except U87 $\Delta$ EGFR-luc and  
675 HEK293 were authenticated via short tandem repeat profiling before use. All cells were cultured at  
676 37 °C under 5% CO<sub>2</sub>, and passaged before becoming fully confluent up to 40 passages. All cells were  
677 periodically tested for mycoplasma contamination.

678

679 **Cell-based ELISA**

680 Cells (U87 $\Delta$ EGFR or HEK293) were seeded in a culture-treated 96-well clear plate (10,000 cells/well in  
681 100  $\mu$ L culture medium) and incubated at 37 °C with 5% CO<sub>2</sub> for 24 h. Paraformaldehyde (8%, 100  $\mu$ L)  
682 was added to each well and incubated for 15 min at room temperature. The medium was discarded and  
683 the cells were washed three times with 100  $\mu$ L of PBS. Cells were treated with 100  $\mu$ L of blocking buffer  
684 (0.2% BSA in PBS) with agitation at room temperature for 2 h. After the blocking buffer was discarded,  
685 serially diluted samples (in 100  $\mu$ L PBS containing 0.1% BSA) were added and the plate was incubated  
686 overnight at 4 °C with agitation. The buffer was discarded and the cells were washed three times with  
687 100  $\mu$ L of PBS containing 0.25% Tween 20. Cells were then incubated with 100  $\mu$ L of donkey anti-  
688 human IgG–HRP conjugate (diluted 1:10,000 in PBS containing 0.1% BSA) was added and the plate  
689 was incubated at room temperature for 1 h. The plate was washed three times with PBS containing  
690 0.25% Tween 20, and 100  $\mu$ L of 3,3',5,5'-tetramethylbenzidine (TMB) substrate (0.1 mg/mL) in  
691 phosphate–citrate buffer/30% H<sub>2</sub>O<sub>2</sub> (1:0.0003 volume to volume, pH 5) was added. After color was  
692 developed for 10–30 min, 25  $\mu$ L of 3 N-HCl was added to each well and then the absorbance at 450 nm  
693 was recorded using a plate reader (BioTek Synergy HTX). Concentrations were calculated based on a  
694 standard curve. K<sub>D</sub> values were then calculated using Graph Pad Prism 8 software. All assays were  
695 performed in triplicate.

696

697 **Cell viability assay**

698 Cells were seeded in a culture-treated 96-well clear plate (5,000 cells/well in 50  $\mu$ L culture medium)  
699 and incubated at 37 °C under 5% CO<sub>2</sub> for 24 h. Serially diluted samples (50  $\mu$ L) were added to each  
700 well and the plate was incubated at 37 °C for 72 h. After the old medium was replaced with 100  $\mu$ L  
701 fresh medium, 20  $\mu$ L of a mixture of WST-8 (1.5 mg/mL, Cayman chemical) and 1-methoxy-5-  
702 methylphenazinium methylsulfate (100  $\mu$ M, Cayman Chemical) was added to each well, and the plate  
703 was incubated at 37 °C for 2 h. After gently agitating the plate, the absorbance at 460 nm was recorded

704 using a plate reader (BioTek Synergy HTX). EC<sub>50</sub> values were calculated using Graph Pad Prism 8  
705 software. All assays were performed in triplicate.

706

### 707 **Animal studies**

708 All procedures were approved by the Animal Welfare Committee of the University of Texas Health  
709 Science Center at Houston and performed in accordance with the institutional guidelines for animal  
710 care and use. All animals were housed under controlled conditions, namely 21–22 °C (+/- 0.5 °C), 30–  
711 75% (+/-10%) relative humidity, and 12:12 light/dark cycle with lights on at 7.00 a.m. Food and water  
712 were available ad libitum for all animals. NSG mice were purchased from The Jackson Laboratory  
713 (stock number: 005557) and bred in house. CD-1<sup>®</sup> mice was purchased from Charles River  
714 Laboratories (Strain Code: 022) and used without in-house breeding.

715

### 716 **Orthotopic xenograft mouse models of human brain tumors**

717 U87ΔEGFR-luc ( $1 \times 10^5$  cells), GBM12 ( $2 \times 10^5$  cells), or JIMT1-BR3 ( $2 \times 10^5$  cells) were  
718 stereotactically implanted into NSG mice (6–8 weeks old, male and female) based on the previously  
719 reported method (Otani et al., 2020). Typical procedure. NSG mice were injected intraperitoneally with  
720 a cocktail of ketamine (67.5 mg/kg) and dexmedetomidine (0.45 mg/kg) and maintained at 37 °C on a  
721 heating pad until the completion of surgery. After the head skin was shaved and treated with 10 μL of  
722 0.25% bupivacaine supplemented with epinephrine (1:200,000), anesthetized mice were placed on a  
723 stereotactic instrument. After disinfecting the head skin with chlorhexidine and ethanol, a small incision  
724 was made and then a burr hole was drilled into the skull over the right hemisphere (1 mm anterior and  
725 2 mm lateral to the bregma). A 10 μL Hamilton syringe (model 701 N) was loaded with cells suspended  
726 in 2 μL cold hanks-balanced salt solution (HBSS) and slowly inserted into the right hemisphere through  
727 the burr hole (3.5 mm depth). After a 1-min hold time, cells were injected over a 5-min period (0.4  
728 μL/min). After a 3-min hold time, the needle was retracted at a rate of 0.75 mm/min. The incision was  
729 closed using GLUture<sup>®</sup> (Zoetis) and mice were injected with atipamezole (1 mg/kg, i.p.).

730 **Treatment study**

731 Brain tumor-bearing NSG mice were randomized and injected intravenously with a single dose of either  
732 ADC (3 mg/kg) or PBS. Group assignment and dose schedule were as follows: U87 $\Delta$ EGFR-luc model,  
733 n = 4 or 6 for vehicle, n = 6 for ADCs, injected on Day 5; GBM12 model, n = 15 for vehicle, n = 14 for  
734 ADCs injected on Day 8; JIMT-1-BR3 model, n = 6 for all groups, injected on Day 7. Growth of  
735 U87 $\Delta$ EGFR-luc tumors was monitored by bioluminescence imaging (BLI) using an Xtreme *in vivo*  
736 imager (Bruker Biospin, upper limit:  $1.5 \times 10^5$  photons/sec/mm<sup>2</sup>; lower limit:  $5.0 \times 10^3$  photons/sec/mm<sup>2</sup>)  
737 once every week. Tumor growth was also evaluated by MRI (see the following sections for details).  
738 Body weight was monitored every 3–4 days and mice were euthanized when body weight loss of >20%  
739 or any severe clinical symptom was observed.

740

741 **MRI and measurement of tumor volume (GBM12 model)**

742 MRI was performed using a 7 Tesla MRI scanner (Bruker Biospin) on Day 18 post tumor implantation.  
743 Tumor-bearing mice (n = 4/group, randomly selected from each group) were anesthetized with 1.5%  
744 isoflurane in a 30:70 mixture of O<sub>2</sub> and medical air. MRI contrast agent (Dotarem) was injected (50  $\mu$ L,  
745 i.p.) before imaging to help visualize the tumor. T2-weighted images were acquired using a multi-echo  
746 RARE sequence with a RARE factor of 3. Acquisition parameters were as follows: TR = 5000 ms, TE =  
747 17 42.5 68 and 93.5 ms, 15 image slices with 100  $\mu$ m slice thickness, in-plane resolution = 100  $\times$  100  
748  $\mu$ m<sup>2</sup>. ImageJ software was utilized to measure the tumor volume. Regions of interest (ROI) were  
749 manually drawn to circumscribe the entire tumor, and volume was calculated by counting all the voxels  
750 within the ROI and multiplying the total number of pixels by the volume of the voxel (100  $\times$  100  $\times$  500  
751  $\mu$ m<sup>3</sup>).

752

753 **MRI in the U87 $\Delta$ EGFR-luc and JIMT-1-BR3 models**

754 MRI images were taken using a 7 Tesla MRI scanner (Bruker Biospin) on Day 58 (JIMT-1-BR3) or Day  
755 61 (U87 $\Delta$ EGFR-luc) post tumor implantation. Tumor-bearing mice (U87 $\Delta$ EGFR-luc model: 4 survivor

756 mice treated with homogeneous anti-EGFRvIII ADC 4; JIMT-1: n = 6/group) were anesthetized with 2%  
757 isoflurane throughout the imaging procedure. A 35mm ID volume coil (Bruker Biospin) receive setup  
758 was used for data acquisition. T2-weighted coronal and axial images were acquired with a Spin Echo  
759 RARE sequence. Acquisition parameters were as follows: TR = 3000 ms, TE = 57 ms, RARE factor 12,  
760 6 NAV, Slice thickness of 0.75 mm, slice gap 0.25 mm, in plane resolution of 156  $\mu\text{m}$  for coronal and  
761 117  $\mu\text{m}$  for axial.

762

### 763 **Immunohistochemistry**

764 Mice were euthanized at the end of the treatment study in the GBM12 model and their excised tumor-  
765 bearing brain were embedded in paraffin. Samples were deparaffinized using xylene and rehydrated in  
766 decreasing concentration of ethanol. Subsequently, slices were incubated in 0.3%  $\text{H}_2\text{O}_2$  for 30 min and  
767 autoclaved for 15 min at 121°C in citrate buffer. After blocking with animal-free blocking solution, slices  
768 were incubated with either rabbit anti-cCaspase 3 antibody (1:250), rabbit anti-EGFR antibody (1:50),  
769 or rabbit anti-ki67 antibody (1:200). SignalStain<sup>®</sup> Boost IHC Detection Reagent and DAB substrate kit  
770 (Cell Signaling Technology) were used and then the sections were counterstained with hematoxylin.  
771 Bright-field images were taken using an EVOS-FL Auto2 imaging system (Invitrogen). For cleaved  
772 caspase-3 and ki67 quantification, three representative areas of each stained sample were imaged and  
773 the populations of cCaspase3- and ki67-positive cells were analyzed using Image J software.

774

### 775 **In vivo pharmacokinetic study**

776 CD-1<sup>®</sup> mice (6–8 weeks old, female, n = 3/group) were injected intravenously with each mAb or ADC (3  
777 mg/kg). Blood samples (5  $\mu\text{L}$ ) were collected from each mouse via the tail vein at each time point (15  
778 min, 6 h, 1 day, 2 days, 4 days, 9 days, and 14 days) and immediately processed with 495  $\mu\text{L}$  of 5 mM  
779 EDTA/PBS. After removal of cells by centrifugation (10 min at 10,000  $\times g$  at 4 °C), plasma samples  
780 were stored at -80 °C until use. All mice were humanely killed after last blood collection. Plasma  
781 samples were analyzed by sandwich ELISA. For determination of the total antibody concentration (both



782 conjugated and unconjugated), a high-binding 96-well plate (Corning) was treated with goat anti-human  
783 IgG Fc antibody (500 ng/well). After overnight surface coating at 4 °C, the plate was blocked with 100  
784  $\mu$ L of 2% BSA in PBS containing 0.05% Tween 20 (PBS-T) with agitation at room temperature for 1 h.  
785 Subsequently, the solution was removed and each diluted plasma sample (100  $\mu$ L, diluted with PBS-T  
786 containing 1% BSA) was added to each well, and the plate was incubated at room temperature for 2 h.  
787 After each well was washed three times with 100  $\mu$ L of PBS-T, 100  $\mu$ L of goat anti-human IgG Fab–  
788 HRP conjugate (1:5,000) was added. After being incubated at room temperature for 1 h, the plate was  
789 washed and color development was performed as described above (see the section of “Cell-based  
790 ELISA”) . For determination of ADC concentration (conjugated only), assays were performed in the  
791 same manner using the following proteins and antibodies: human EGFR (100 ng/well, #EGR-H5222  
792 from ACROBiosystems) for plate coating, and rabbit anti-MMAF antibody (1:5,000) and goat anti-rabbit  
793 IgG–HRP conjugate (1:10,000) as secondary and tertiary detection antibodies, respectively.  
794 Concentrations were calculated based on a standard curve. Half-life at the elimination phase ( $t_{1/2\beta}$ , day)  
795 and clearance rate [CL, (mg/kg)/( $\mu$ g/mL)/day] of each conjugate were estimated using methods for non-  
796 compartmental analysis (Gabrielsson and Weiner, 2012). PKSolver (a freely available menu-driven  
797 add-in program for Microsoft Excel) (Zhang et al., 2010) was used for this calculation. Area under the  
798 curve ( $AUC_{0-14 \text{ days}}$ ,  $\mu$ g/mL  $\times$  day) was calculated using GraphPad Prism 8 software. See **Table S3** for  
799 all observed PK parameters.

800

### 801 **Ex vivo fluorescence imaging and quantification**

802 Intracranial U87 $\Delta$ EGFR-luc tumor-bearing NSG mice (6–8 weeks old, male and female) were prepared  
803 as described above and randomized into three groups (n = 3) 5 days post tumor implantation. Each  
804 Cy5.5 conjugate was administered intravenously at 3 mg/kg. After 48 h, the tumor-bearing mice were  
805 anesthetized with ketamine/xylazine. Subsequently, the mice underwent cardiac perfusion with PBS(+)  
806 containing sodium heparin (10 units/mL) and 4% paraformaldehyde/PBS(+). Major organs including the  
807 brain were then harvested. Cy5.5-based near-infrared fluorescence images of the harvested organs



808 were taken using a LI-COR Odyssey 9120 imager (Ex: 685 nm laser, intensity: L1.0 for brain, L2.0 for  
809 other organs, Em: 700 nm channel). Semi-quantification of the signals from ROIs was also performed  
810 using LI-COR Image Studio software. For tissue imaging, the brain samples were embedded in paraffin  
811 and tissue sections were prepared (thickness: 5  $\mu$ m). After de-paraffinization of using toluene, mounting  
812 medium containing DAPI (VECTOR #H-1200) was applied to the tissue slides. Fluorescence Images  
813 were taken using a Nikon Eclipse TE2000E inverted microscope (Cy5 channel). Three ROIs in each  
814 sample were acquired and analyzed for semi-quantification using ImageJ software.

815

### 816 **Intravital imaging**

817 Male NSG mice (6–8 weeks old) were implanted with GBM12-RFP cells ( $2 \times 10^5$  cells) stereotactically  
818 into the right hemisphere (2 mm lateral and 2.5 mm posterior to bregma, 1 mm depth) as previously  
819 described (Nair et al., 2020). Thirteen days after tumor implantation, craniectomy was performed over  
820 the tumor-implanted area. Cover glass (Bioscience Tools) was placed on the brain surface and glued to  
821 the skull with dental resin. Next day (Day 14), each Cy5.5 conjugate was administrated intravenously at  
822 3 mg/kg ( $n = 4$  for Cys-Cy5.5 conjugate **9**;  $n = 3$  for the other groups). For intravital imaging, mice were  
823 anesthetized with isoflurane and positioned on the stage of a A1R-MP confocal microscope (NIKON)  
824 equipped with  $\times 16$  water immersion objective lens. Subsequently, 100  $\mu$ L of 2% FITC-conjugated  
825 dextran (500 kDa, Sigma) was administrated through the tail vein, and Z-stack images were acquired  
826 based on Cy5.5, FITC, and RFP signals. Pre- and post-treatment images were acquired on Day 14, 15,  
827 17, 19, and 22 after tumor implantation. The images were analyzed using NIS Elements AR software  
828 (NIKON). Intensity of the RFP (derived from GBM12-RFP) and Cy5.5 signals in two or three  
829 independent ROIs were calculated to determine Cy5.5/GBM12-RFP ratios.

830

### 831 **Statistical Analyses**

832 Kaplan-Meier survival curve statistics were analyzed with a log-rank (Mantel–Cox) test. To control the  
833 family-wise error rate in multiple comparisons, crude  $P$  values were adjusted by the Bonferroni method.

834 Differences with adjusted  $P$  values  $<0.05$  were considered statistically significant in all analysis. For  
835 immunohistochemistry, immunofluorescence, ex vivo fluorescence imaging, MRI, and intravital imaging,  
836 a one-way ANOVA with a Tukey–Kramer or Dunnett’s post hoc test was used for multiple comparisons.  
837 See **Table S4** for all  $P$  values.

838

## 839 REFERENCES

- 840 Abbott, N.J., Patabendige, A.A.K., Dolman, D.E.M., Yusof, S.R., and Begley, D.J. (2010). Structure and  
841 function of the blood-brain barrier. *Neurobiol. Dis.* *37*, 13–25.
- 842 Anami, Y., and Tsuchikama, K. (2020). Transglutaminase-Mediated Conjugations. *Methods Mol. Biol.*  
843 *2078*, 71–82.
- 844 Anami, Y., Xiong, W., Gui, X., Deng, M., Zhang, C.C., Zhang, N., An, Z., and Tsuchikama, K. (2017).  
845 Enzymatic conjugation using branched linkers for constructing homogeneous antibody-drug conjugates  
846 with high potency. *Org. Biomol. Chem.* *15*, 5635–5642.
- 847 Anami, Y., Yamazaki, C.M., Xiong, W., Gui, X., Zhang, N., An, Z., and Tsuchikama, K. (2018). Glutamic  
848 acid-valine-citrulline linkers ensure stability and efficacy of antibody-drug conjugates in mice. *Nat.*  
849 *Commun.* *9*, 2512.
- 850 Arvanitis, C.D., Ferraro, G.B., and Jain, R.K. (2020). The blood-brain barrier and blood-tumour barrier  
851 in brain tumours and metastases. *Nat. Rev. Cancer* *20*, 26–41.
- 852 Banks, W.A. (2016). From blood-brain barrier to blood-brain interface: new opportunities for CNS drug  
853 delivery. *Nat. Rev. Drug Discov.* *15*, 275–292.
- 854 Brennan, C.W., Verhaak, R.G.W., McKenna, A., Campos, B., Nounmeh, H., Salama, S.R., Zheng, S.,  
855 Chakravarty, D., Sanborn, J.Z., Berman, S.H., et al. (2013). The somatic genomic landscape of  
856 glioblastoma. *Cell* *155*, 462–477.
- 857 Bryant, P., Pabst, M., Badescu, G., Bird, M., McDowell, W., Jamieson, E., Swierkosz, J., Jurlewicz, K.,  
858 Tommasi, R., Henseleit, K., et al. (2015). In Vitro and In Vivo Evaluation of Cysteine Rebridged  
859 Trastuzumab-MMAE Antibody Drug Conjugates with Defined Drug-to-Antibody Ratios. *Mol. Pharm.* *12*,  
860 1872–1879.
- 861 Chau, C.H., Steeg, P.S., and Figg, W.D. (2019). Antibody-drug conjugates for cancer. *Lancet* *394*,  
862 793–804.
- 863 Chinot, O.L., Wick, W., Mason, W., Henriksson, R., Saran, F., Nishikawa, R., Carpentier, A.F., Hoang-  
864 Xuan, K., Kavan, P., Cernea, D., et al. (2014). Bevacizumab plus radiotherapy-temozolomide for newly  
865 diagnosed glioblastoma. *N. Engl. J. Med.* *370*, 709–722.
- 866 Deonarain, M., Yahioglu, G., and Bhatti, M. (2014). Biological materials and uses thereof.
- 867 Dhillon, S. (2018). Moxetumomab Pasudotox: First Global Approval. *Drugs* *78*, 1763–1767.
- 868 Doronina, S.O., Mendelsohn, B.A., Bovee, T.D., Cerveny, C.G., Alley, S.C., Meyer, D.L., Oflazoglu, E.,  
869 Toki, B.E., Sanderson, R.J., Zabinski, R.F., et al. (2006). Enhanced activity of monomethylauristatin F  
870 through monoclonal antibody delivery: effects of linker technology on efficacy and toxicity. *Bioconjug.*  
871 *Chem.* *17*, 114–124.
- 872 Drago, J.Z., Modi, S., and Chandarlapaty, S. (2021). Unlocking the potential of antibody-drug  
873 conjugates for cancer therapy. *Nat. Rev. Clin. Oncol.* *18*, 327–344.
- 874 Eli Lilly (2004). Erbitux (cetuximab) Label.

- 875 Frka-Petesic, B., Zanchi, D., Martin, N., Carayon, S., Huille, S., and Tribet, C. (2016). Aggregation of  
876 Antibody Drug Conjugates at Room Temperature: SAXS and Light Scattering Evidence for Colloidal  
877 Instability of a Specific Subpopulation. *Langmuir* 32, 4848–4861.
- 878 Gabrielsson, J., and Weiner, D. (2012). Non-compartmental analysis. *Methods Mol. Biol.* 929, 377–389.
- 879 Giddens, J.P., Lomino, J.V., DiLillo, D.J., Ravetch, J.V., and Wang, L.-X. (2018). Site-selective  
880 chemoenzymatic glycoengineering of Fab and Fc glycans of a therapeutic antibody. *Proc. Natl. Acad.  
881 Sci. U. S. A.* 115, 12023–12027.
- 882 Gril, B., Wei, D., Zimmer, A.S., Robinson, C., Khan, I., Difilippantonio, S., Overstreet, M.G., and Steeg,  
883 P.S. (2020). HER2 antibody-drug conjugate controls growth of breast cancer brain metastases in  
884 hematogenous xenograft models, with heterogeneous blood-tumor barrier penetration unlinked to a  
885 passive marker. *Neuro. Oncol.* 22, 1625–1636.
- 886 Hamblett, K.J., Senter, P.D., Chace, D.F., Sun, M.M.C., Lenox, J., Cerveny, C.G., Kissler, K.M.,  
887 Bernhardt, S.X., Kopcha, A.K., Zabinski, R.F., et al. (2004). Effects of drug loading on the antitumor  
888 activity of a monoclonal antibody drug conjugate. *Clin. Cancer Res.* 10, 7063–7070.
- 889 Hamblett, K.J., Kozlosky, C.J., Siu, S., Chang, W.S., Liu, H., Foltz, I.N., Trueblood, E.S., Meininger, D.,  
890 Arora, T., Twomey, B., et al. (2015). AMG 595, an Anti-EGFRvIII Antibody-Drug Conjugate, Induces  
891 Potent Antitumor Activity against EGFRvIII-Expressing Glioblastoma. *Mol. Cancer Ther.* 14, 1614–  
892 1624.
- 893 Herbst, R.S., Giaccone, G., de Marinis, F., Reinmuth, N., Vergnenegre, A., Barrios, C.H., Morise, M.,  
894 Felip, E., Andric, Z., Geater, S., et al. (2020). Atezolizumab for First-Line Treatment of PD-L1-Selected  
895 Patients with NSCLC. *N. Engl. J. Med.* 383, 1328–1339.
- 896 Hidalgo, M., Amant, F., Biankin, A.V., Budinská, E., Byrne, A.T., Caldas, C., Clarke, R.B., de Jong, S.,  
897 Jonkers, J., Mælandsmo, G.M., et al. (2014). Patient-derived xenograft models: an emerging platform  
898 for translational cancer research. *Cancer Discov.* 4, 998–1013.
- 899 Inda, M.-D.-M., Bonavia, R., and Seoane, J. (2014). Glioblastoma multiforme: a look inside its  
900 heterogeneous nature. *Cancers* 6, 226–239.
- 901 Junutula, J.R., Raab, H., Clark, S., Bhakta, S., Leipold, D.D., Weir, S., Chen, Y., Simpson, M., Tsai,  
902 S.P., Dennis, M.S., et al. (2008). Site-specific conjugation of a cytotoxic drug to an antibody improves  
903 the therapeutic index. *Nat. Biotechnol.* 26, 925–932.
- 904 Junutula, J.R., Flagella, K.M., Graham, R.A., Parsons, K.L., Ha, E., Raab, H., Bhakta, S., Nguyen, T.,  
905 Dugger, D.L., Li, G., et al. (2010). Engineered thio-trastuzumab-DM1 conjugate with an improved  
906 therapeutic index to target human epidermal growth factor receptor 2-positive breast cancer. *Clin.  
907 Cancer Res.* 16, 4769–4778.
- 908 Kim, M., Ma, D.J., Calligaris, D., Zhang, S., Feathers, R.W., Vaubel, R.A., Meaux, I., Mladek, A.C.,  
909 Parrish, K.E., Jin, F., et al. (2018). Efficacy of the MDM2 Inhibitor SAR405838 in Glioblastoma Is  
910 Limited by Poor Distribution Across the Blood-Brain Barrier. *Mol. Cancer Ther.* 17, 1893–1901.
- 911 Lhospice, F., Brégeon, D., Belmant, C., Dennler, P., Chiotellis, A., Fischer, E., Gauthier, L., Boëdec, A.,  
912 Rispaud, H., Savard-Chambard, S., et al. (2015). Site-Specific Conjugation of Monomethyl Auristatin E  
913 to Anti-CD30 Antibodies Improves Their Pharmacokinetics and Therapeutic Index in Rodent Models.  
914 *Mol. Pharm.* 12, 1863–1871.

- 915 Li, Z., Krippendorff, B.-F., Sharma, S., Walz, A.C., Lavé, T., and Shah, D.K. (2016). Influence of  
916 molecular size on tissue distribution of antibody fragments. *MABs* 8, 113–119.
- 917 Lyon, R.P., Setter, J.R., Bovee, T.D., Doronina, S.O., Hunter, J.H., Anderson, M.E., Balasubramanian,  
918 C.L., Duniho, S.M., Leiske, C.I., Li, F., et al. (2014). Self-hydrolyzing maleimides improve the stability  
919 and pharmacological properties of antibody-drug conjugates. *Nat. Biotechnol.* 32, 1059–1062.
- 920 Marin, B.-M., Porath, K.A., Jain, S., Kim, M., Conage-Pough, J.E., Oh, J.-H., Miller, C.L., Talele, S.,  
921 Kitange, G.J., Tian, S., et al. (2021). Heterogeneous delivery across the blood-brain barrier limits the  
922 efficacy of an EGFR-targeting antibody drug conjugate in glioblastoma. *Neuro. Oncol.*
- 923 Mullard, A. (2021). FDA approves ADC Therapeutics' loncastuximab tesirine, ushering in a new  
924 cytotoxic payload. *Nat. Rev. Drug Discov.* 10.
- 925 Nair, M., Khosla, M., Otani, Y., Yeh, M., Park, F., Shimizu, T., Kang, J.M., Bolyard, C., Yu, J.-G., Kumar  
926 Banasavadi-Siddegowda, Y., et al. (2020). Enhancing Antitumor Efficacy of Heavily Vascularized  
927 Tumors by RAMBO Virus through Decreased Tumor Endothelial Cell Activation. *Cancers* 12.
- 928 Newman, D.J. (2019). The “Utility” of Highly Toxic Marine-Sourced Compounds. *Mar. Drugs* 17, 324.
- 929 Otani, Y., Yoo, J.Y., Chao, S., Liu, J., Jaime-Ramirez, A.C., Lee, T.J., Hurwitz, B., Yan, Y., Dai, H.,  
930 Glorioso, J.C., et al. (2020). Oncolytic HSV-Infected Glioma Cells Activate NOTCH in Adjacent Tumor  
931 Cells Sensitizing Tumors to Gamma Secretase Inhibition. *Clin. Cancer Res.* 26, 2381–2392.
- 932 Palmieri, D., Duchnowska, R., Woditschka, S., Hua, E., Qian, Y., Biernat, W., Sosińska-Mielcarek, K.,  
933 Gril, B., Stark, A.M., Hewitt, S.M., et al. (2014). Profound prevention of experimental brain metastases  
934 of breast cancer by temozolomide in an MGMT-dependent manner. *Clin. Cancer Res.* 20, 2727–2739.
- 935 Parker, N.R., Khong, P., Parkinson, J.F., Howell, V.M., and Wheeler, H.R. (2015). Molecular  
936 heterogeneity in glioblastoma: potential clinical implications. *Front. Oncol.* 5, 55.
- 937 Parrish, K.E., Cen, L., Murray, J., Calligaris, D., Kizilbash, S., Mittapalli, R.K., Carlson, B.L., Schroeder,  
938 M.A., Sludden, J., Boddy, A.V., et al. (2015). Efficacy of PARP Inhibitor Rucaparib in Orthotopic  
939 Glioblastoma Xenografts Is Limited by Ineffective Drug Penetration into the Central Nervous System.  
940 *Mol. Cancer Ther.* 14, 2735–2743.
- 941 Phillips, A.C., Boghaert, E.R., Vaidya, K.S., Mitten, M.J., Norvell, S., Falls, H.D., DeVries, P.J., Cheng,  
942 D., Meulbroek, J.A., Buchanan, F.G., et al. (2016). ABT-414, an Antibody-Drug Conjugate Targeting a  
943 Tumor-Selective EGFR Epitope. *Mol. Cancer Ther.* 15, 661–669.
- 944 Phillips, A.C., Boghaert, E.R., Vaidya, K.S., Falls, H.D., Mitten, M.J., DeVries, P.J., Benatuil, L., Hsieh,  
945 C.-M., Meulbroek, J.A., Panchal, S.C., et al. (2018). Characterization of ABBV-221, a Tumor-Selective  
946 EGFR-Targeting Antibody Drug Conjugate. *Mol. Cancer Ther.* 17, 795–805.
- 947 Pillow, T.H., Tien, J., Parsons-Reponte, K.L., Bhakta, S., Li, H., Staben, L.R., Li, G., Chuh, J., Fourie-  
948 O'Donohue, A., Darwish, M., et al. (2014). Site-specific trastuzumab maytansinoid antibody-drug  
949 conjugates with improved therapeutic activity through linker and antibody engineering. *J. Med. Chem.*  
950 57, 7890–7899.
- 951 Rosenthal, M., Curry, R., Reardon, D.A., Rasmussen, E., Upreti, V.V., Damore, M.A., Henary, H.A.,  
952 Hill, J.S., and Cloughesy, T. (2019). Safety, tolerability, and pharmacokinetics of anti-EGFRvIII  
953 antibody-drug conjugate AMG 595 in patients with recurrent malignant glioma expressing EGFRvIII.  
954 *Cancer Chemother. Pharmacol.* 84, 327–336.

- 955 Sarkaria, J.N., Carlson, B.L., Schroeder, M.A., Grogan, P., Brown, P.D., Giannini, C., Ballman, K.V.,  
956 Kitange, G.J., Guha, A., Pandita, A., et al. (2006). Use of an orthotopic xenograft model for assessing  
957 the effect of epidermal growth factor receptor amplification on glioblastoma radiation response. *Clin.*  
958 *Cancer Res.* *12*, 2264–2271.
- 959 Sarkaria, J.N., Hu, L.S., Parney, I.F., Pafundi, D.H., Brinkmann, D.H., Laack, N.N., Giannini, C., Burns,  
960 T.C., Kizilbash, S.H., Laramy, J.K., et al. (2018). Is the blood-brain barrier really disrupted in all  
961 glioblastomas? A critical assessment of existing clinical data. *Neuro. Oncol.* *20*, 184–191.
- 962 Shergalis, A., Bankhead, A., 3rd, Luesakul, U., Muangsin, N., and Neamati, N. (2018). Current  
963 Challenges and Opportunities in Treating Glioblastoma. *Pharmacol. Rev.* *70*, 412–445.
- 964 Shi, Y., Fan, X., Meng, W., Deng, H., Zhang, N., and An, Z. (2014). Engagement of immune effector  
965 cells by trastuzumab induces HER2/ERBB2 downregulation in cancer cells through STAT1 activation.  
966 *Breast Cancer Res.* *16*, R33.
- 967 Stupp, R., Mason, W.P., van den Bent, M.J., Weller, M., Fisher, B., Taphoorn, M.J.B., Belanger, K.,  
968 Brandes, A.A., Marosi, C., Bogdahn, U., et al. (2005). Radiotherapy plus concomitant and adjuvant  
969 temozolomide for glioblastoma. *N. Engl. J. Med.* *352*, 987–996.
- 970 Stupp, R., Hegi, M.E., Mason, W.P., van den Bent, M.J., Taphoorn, M.J.B., Janzer, R.C., Ludwin, S.K.,  
971 Allgeier, A., Fisher, B., Belanger, K., et al. (2009). Effects of radiotherapy with concomitant and  
972 adjuvant temozolomide versus radiotherapy alone on survival in glioblastoma in a randomised phase III  
973 study: 5-year analysis of the EORTC-NCIC trial. *Lancet Oncol.* *10*, 459–466.
- 974 van Tellingen, O., Yetkin-Arik, B., de Gooijer, M.C., Wesseling, P., Wurdinger, T., and de Vries, H.E.  
975 (2015). Overcoming the blood-brain tumor barrier for effective glioblastoma treatment. *Drug Resist.*  
976 *Updat.* *19*, 1–12.
- 977 Tumey, L.N., Charati, M., He, T., Sousa, E., Ma, D., Han, X., Clark, T., Casavant, J., Loganzo, F.,  
978 Barletta, F., et al. (2014). Mild method for succinimide hydrolysis on ADCs: impact on ADC potency,  
979 stability, exposure, and efficacy. *Bioconjug. Chem.* *25*, 1871–1880.
- 980 Van Den Bent, M., Eoli, M., Sepulveda, J.M., Smits, M., Walenkamp, A., Frenel, J.-S., Franceschi, E.,  
981 Clement, P.M., Chinot, O., De Vos, F., et al. (2020). INTELLANCE 2/EORTC 1410 randomized phase II  
982 study of Depatux-M alone and with temozolomide vs temozolomide or lomustine in recurrent EGFR  
983 amplified glioblastoma. *Neuro. Oncol.* *22*, 684–693.
- 984 Weller, M., van den Bent, M., Hopkins, K., Tonn, J.C., Stupp, R., Falini, A., Cohen-Jonathan-Moyal, E.,  
985 Frappaz, D., Henriksson, R., Balana, C., et al. (2014). EANO guideline for the diagnosis and treatment  
986 of anaplastic gliomas and glioblastoma. *The Lancet. Oncology* *15*, e395-403.
- 987 White, J.M., Keinänen, O.M., Cook, B.E., Zeglis, B.M., Gibson, H.M., and Viola, N.T. (2020). Removal  
988 of Fc Glycans from [89Zr]Zr-DFO-Anti-CD8 Prevents Peripheral Depletion of CD8+ T Cells. *Mol.*  
989 *Pharm.* *17*, 2099–2108.
- 990 Yamazaki, C.M., Yamaguchi, A., Anami, Y., Xiong, W., Otani, Y., Lee, J., Ueno, N.T., Zhang, N., An, Z.,  
991 and Tsuchikama, K. (2021). Antibody-drug conjugates with dual payloads for combating breast tumor  
992 heterogeneity and drug resistance. *Nat. Commun.* *12*, 3528.
- 993 Yonemori, K., Tsuta, K., Ono, M., Shimizu, C., Hirakawa, A., Hasegawa, T., Hatanaka, Y., Narita, Y.,  
994 Shibui, S., and Fujiwara, Y. (2010). Disruption of the blood brain barrier by brain metastases of triple-  
995 negative and basal-type breast cancer but not HER2/neu-positive breast cancer. *Cancer* *116*, 302–308.

996 Zhang, Y., Huo, M., Zhou, J., and Xie, S. (2010). PKSolver: An add-in program for pharmacokinetic and  
997 pharmacodynamic data analysis in Microsoft Excel. *Comput. Methods Programs Biomed.* 99, 306–314.

998 Zimmer, A.S., Van Swearingen, A.E.D., and Anders, C.K. (2020). HER2-positive breast cancer brain  
999 metastasis: A new and exciting landscape. *Cancer Rep.* e1274.

1000
